# Supplementary material for: Tree Lab: Portable Genomics for Early Detection of Plant Viruses and Pests in Sub-Saharan Africa
Source: Genes (Basel). 2019 Aug 21;10(9):632. doi: 10.3390/genes10090632 (PMC6769854; doi:10.3390/genes10090632)

## Supplement File 1.

Decoding: mr=Tanzania, ut=Uganda and mm=Kenya. BC number correspond to the barcode in Table 2.

Scripts from David Eccles' [Bioinformatics Scripts repository] (<https://doi.org/10.5281/zenodo.596663>) were used to carry out subsequent read QC and analysis. Sequenced read lengths were measured using [fastx-length.pl], and these lengths were used to generate length-based QC plots using [length\_plot.r]. The produced plots are as follows:

1. Curves showing the number of sequenced \*reads\* within each length bin
2. Curves showing the number of sequenced \*bases\* within each length bin
3. Density curves showing the proportion of sequenced bases within each length bin
4. Cumulative density curves showing the proportion of sequenced bases with length greater than a particular length (with L10/L50/L90 highlighted)
5. Digital electrophoresis plot representing graph #2
6. Digital electrophoresis plot representing graph #3

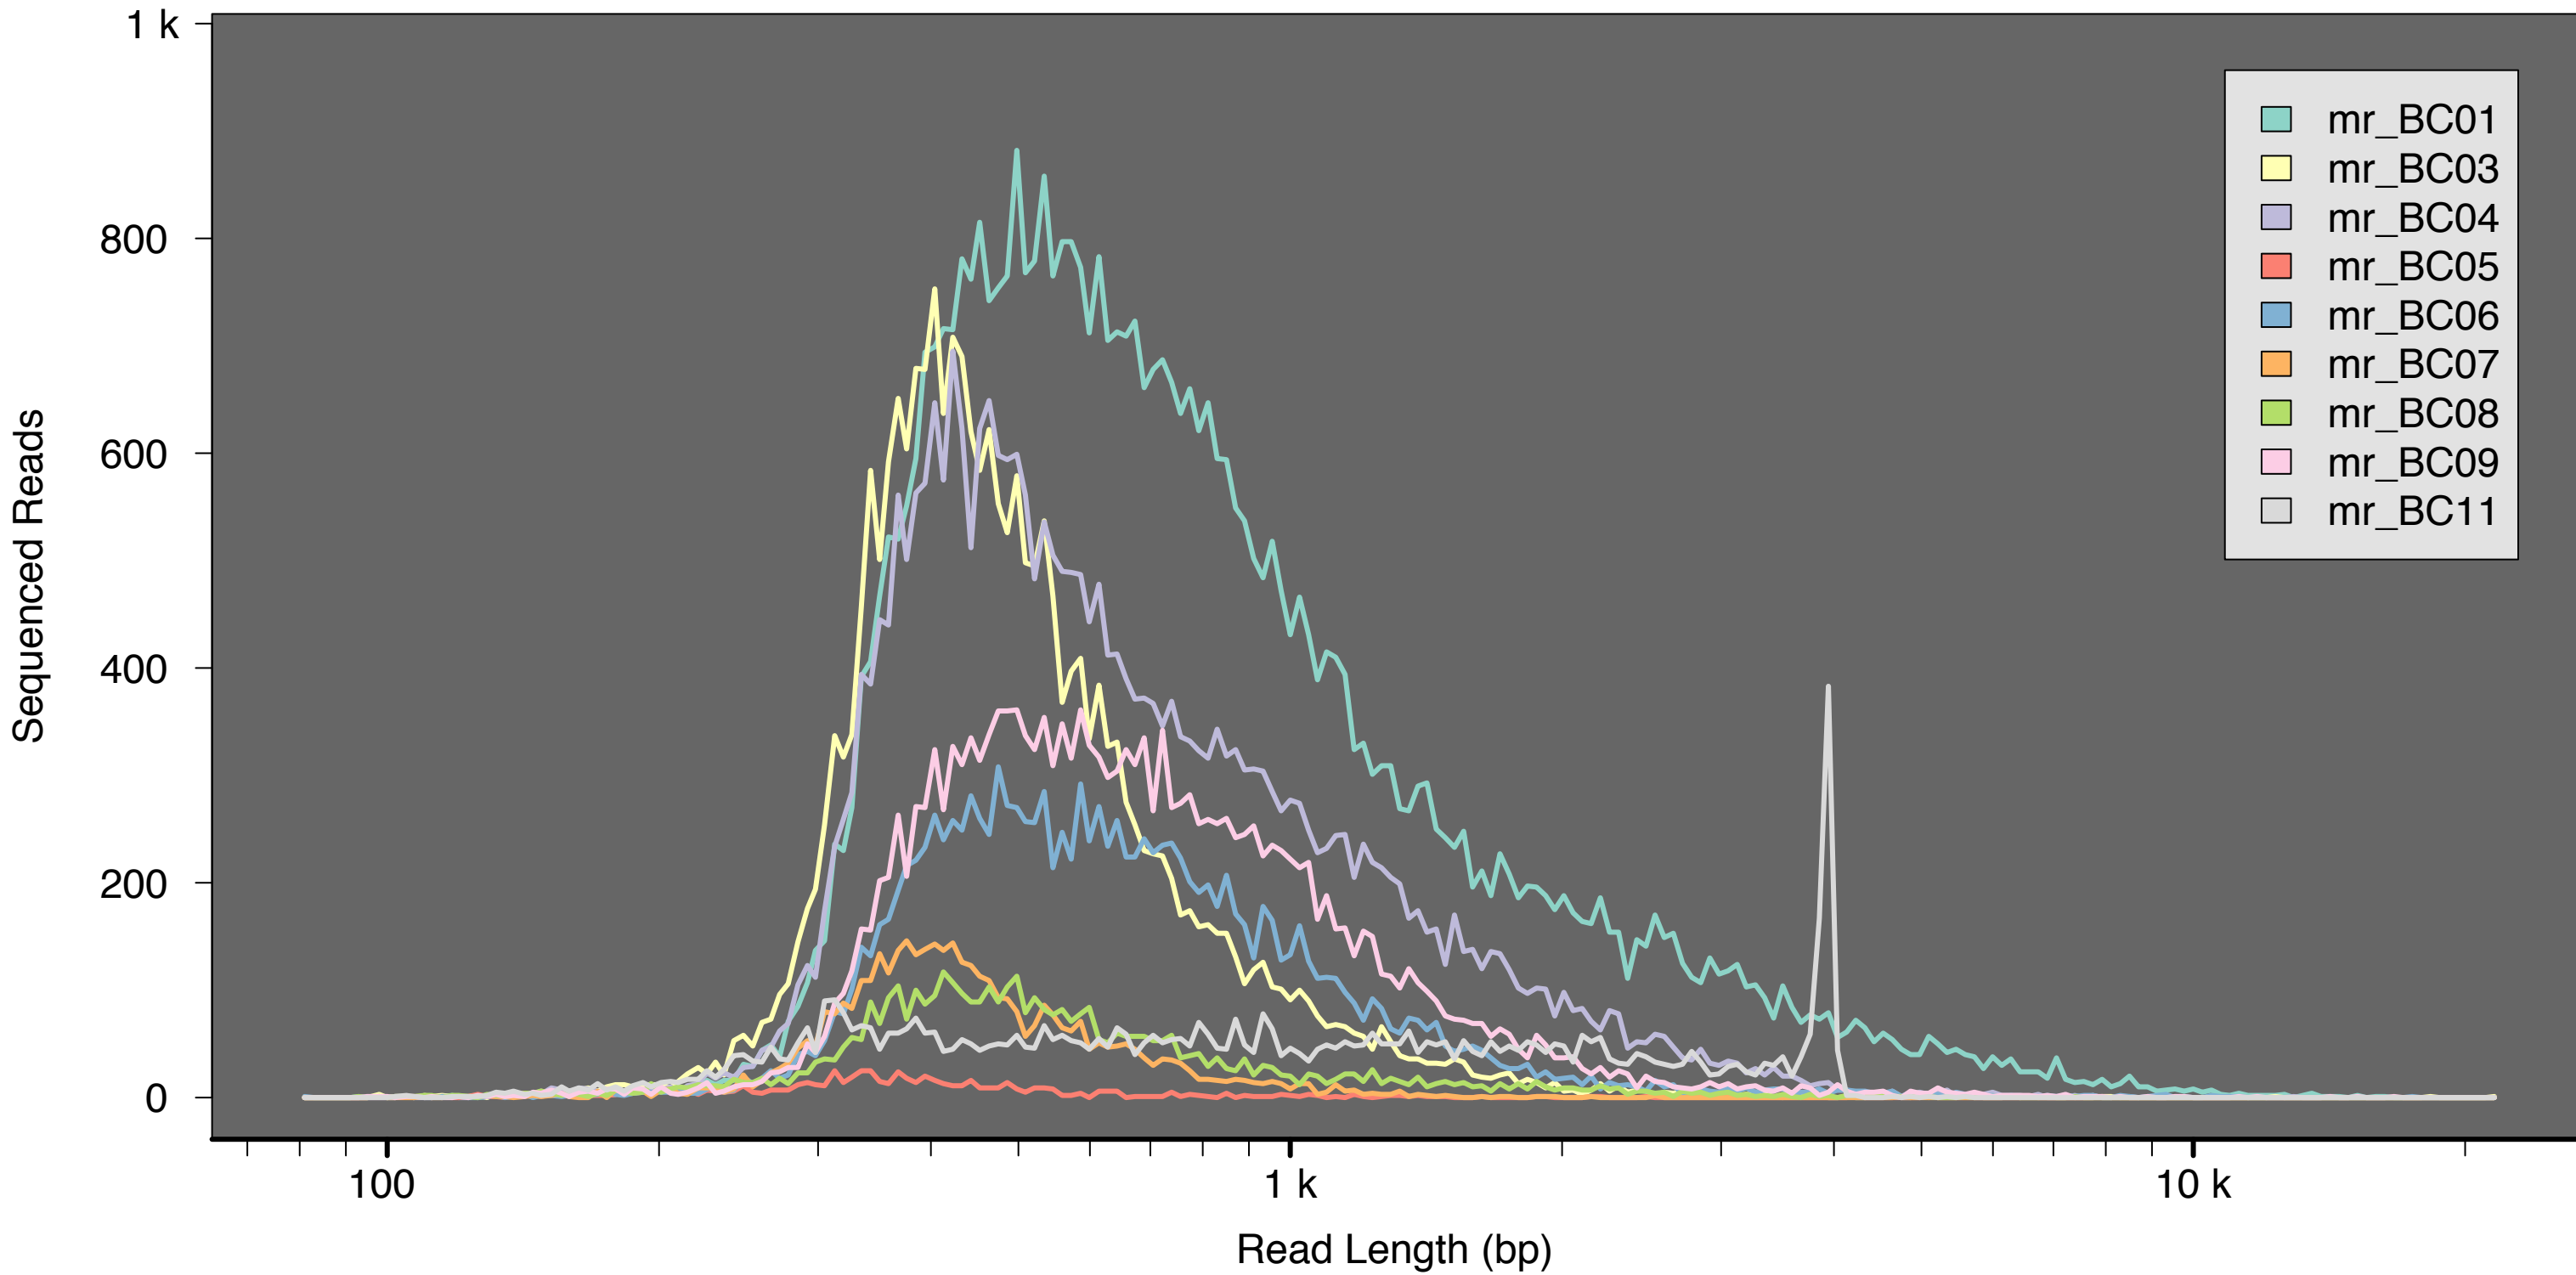

Sequenced Bases

1.5 M

1 M

500 k

0

100

1 k

10 k

Read Length (bp)

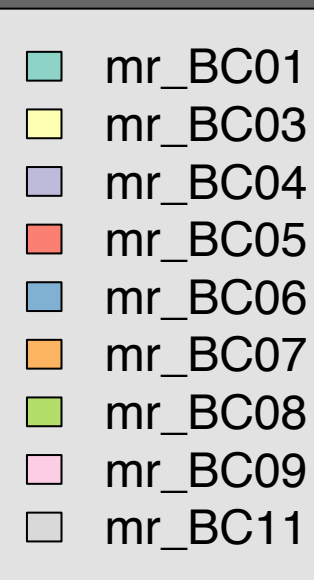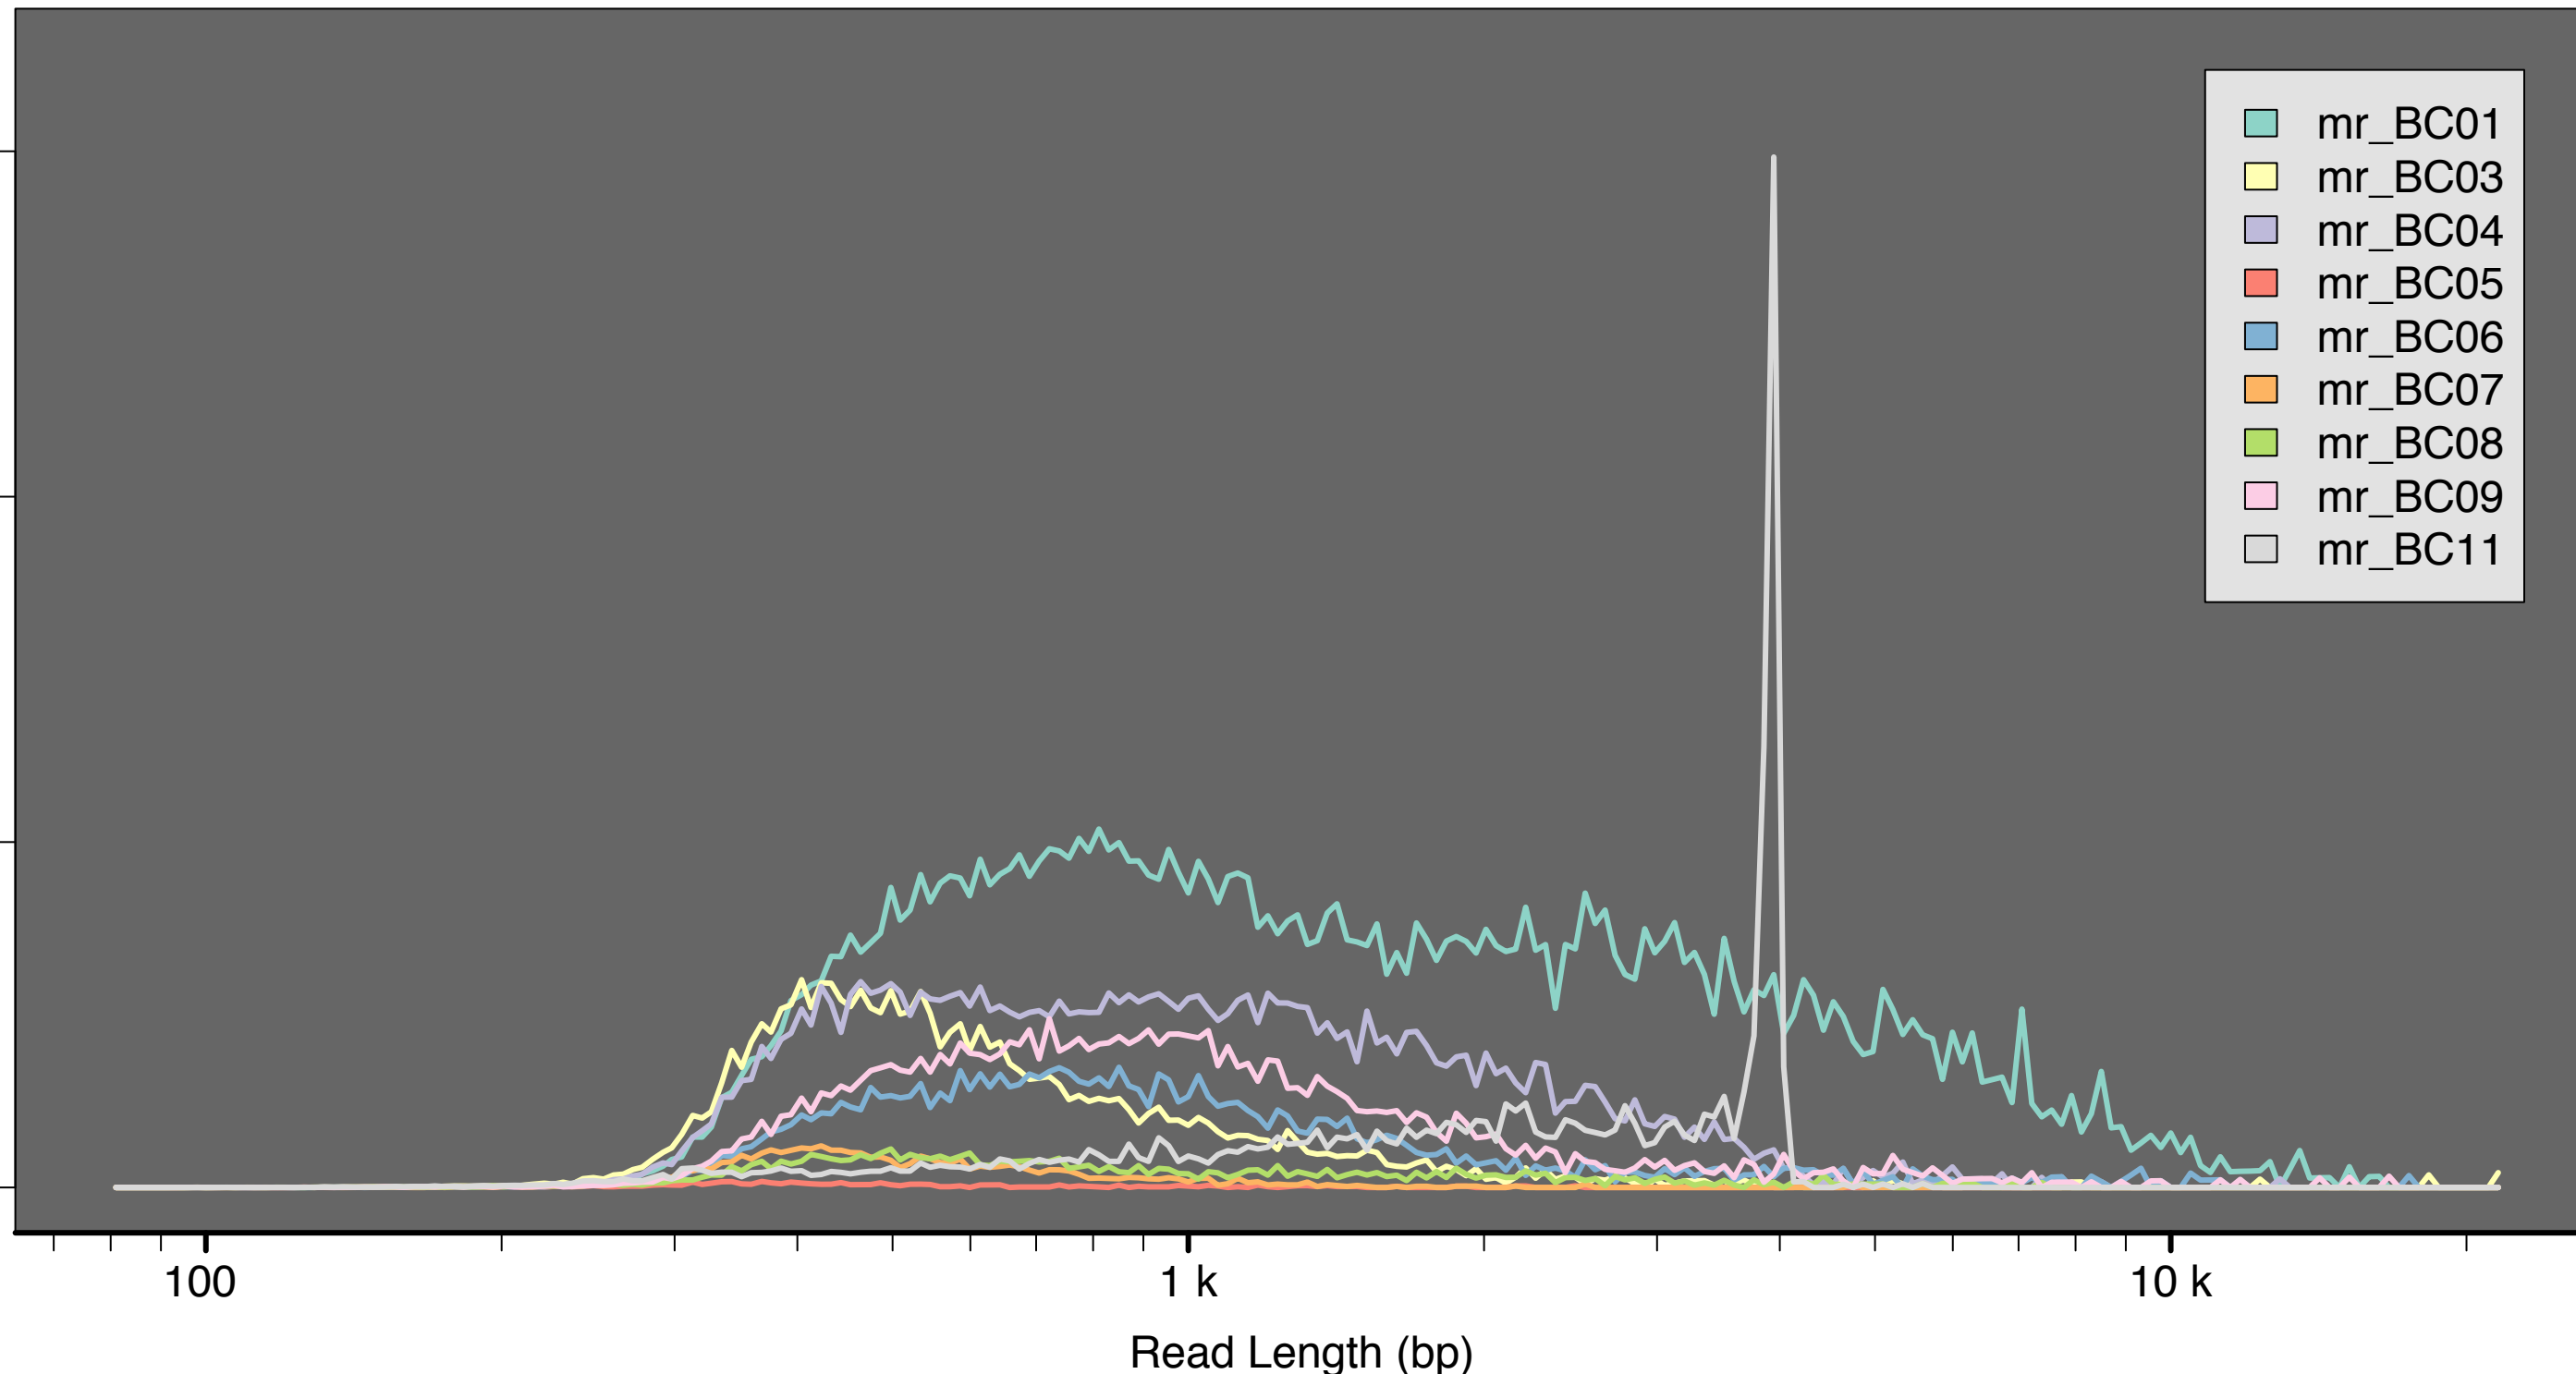

Sequenced Base Proportion

0.15  
0.10  
0.05  
0.00

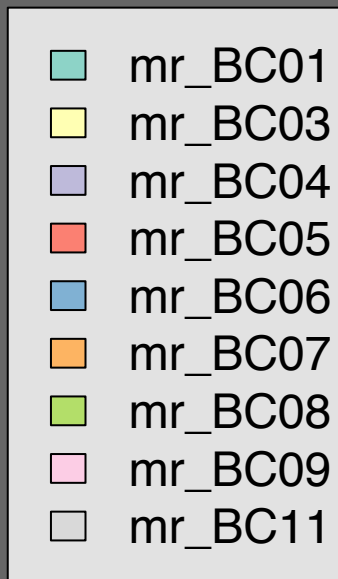

100

1 k

10 k

Read Length (bp)

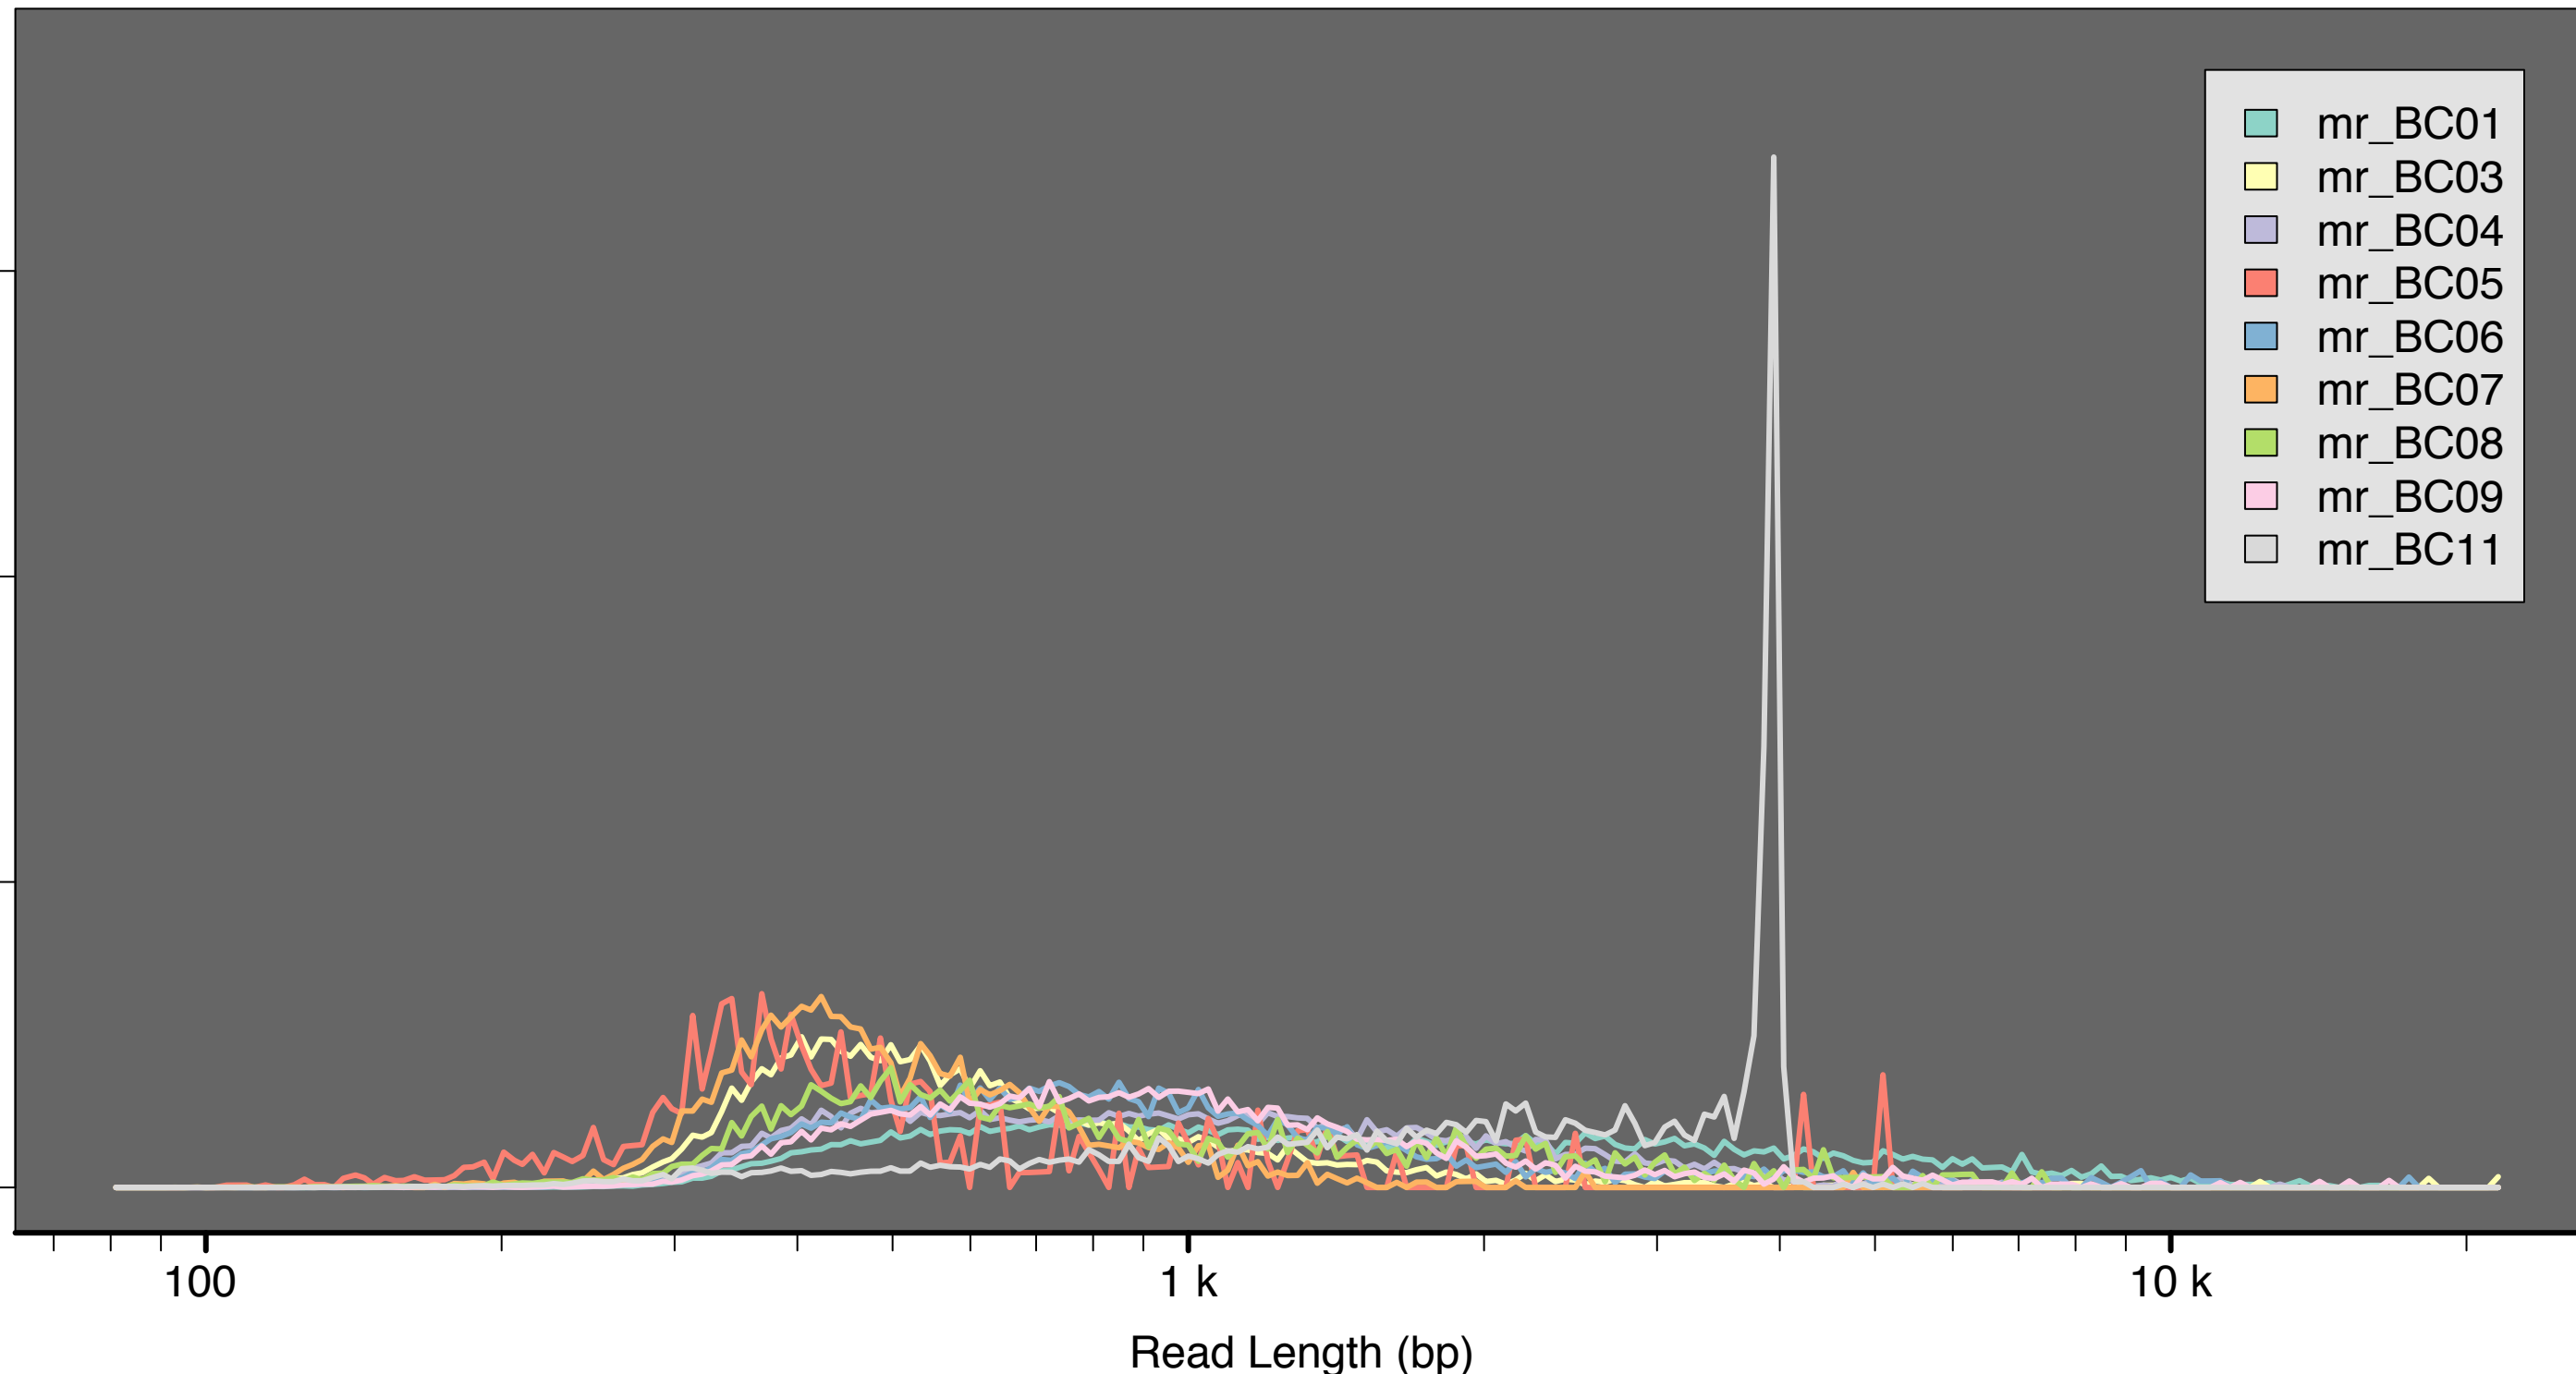

Cumulative Sequenced Bases (%)

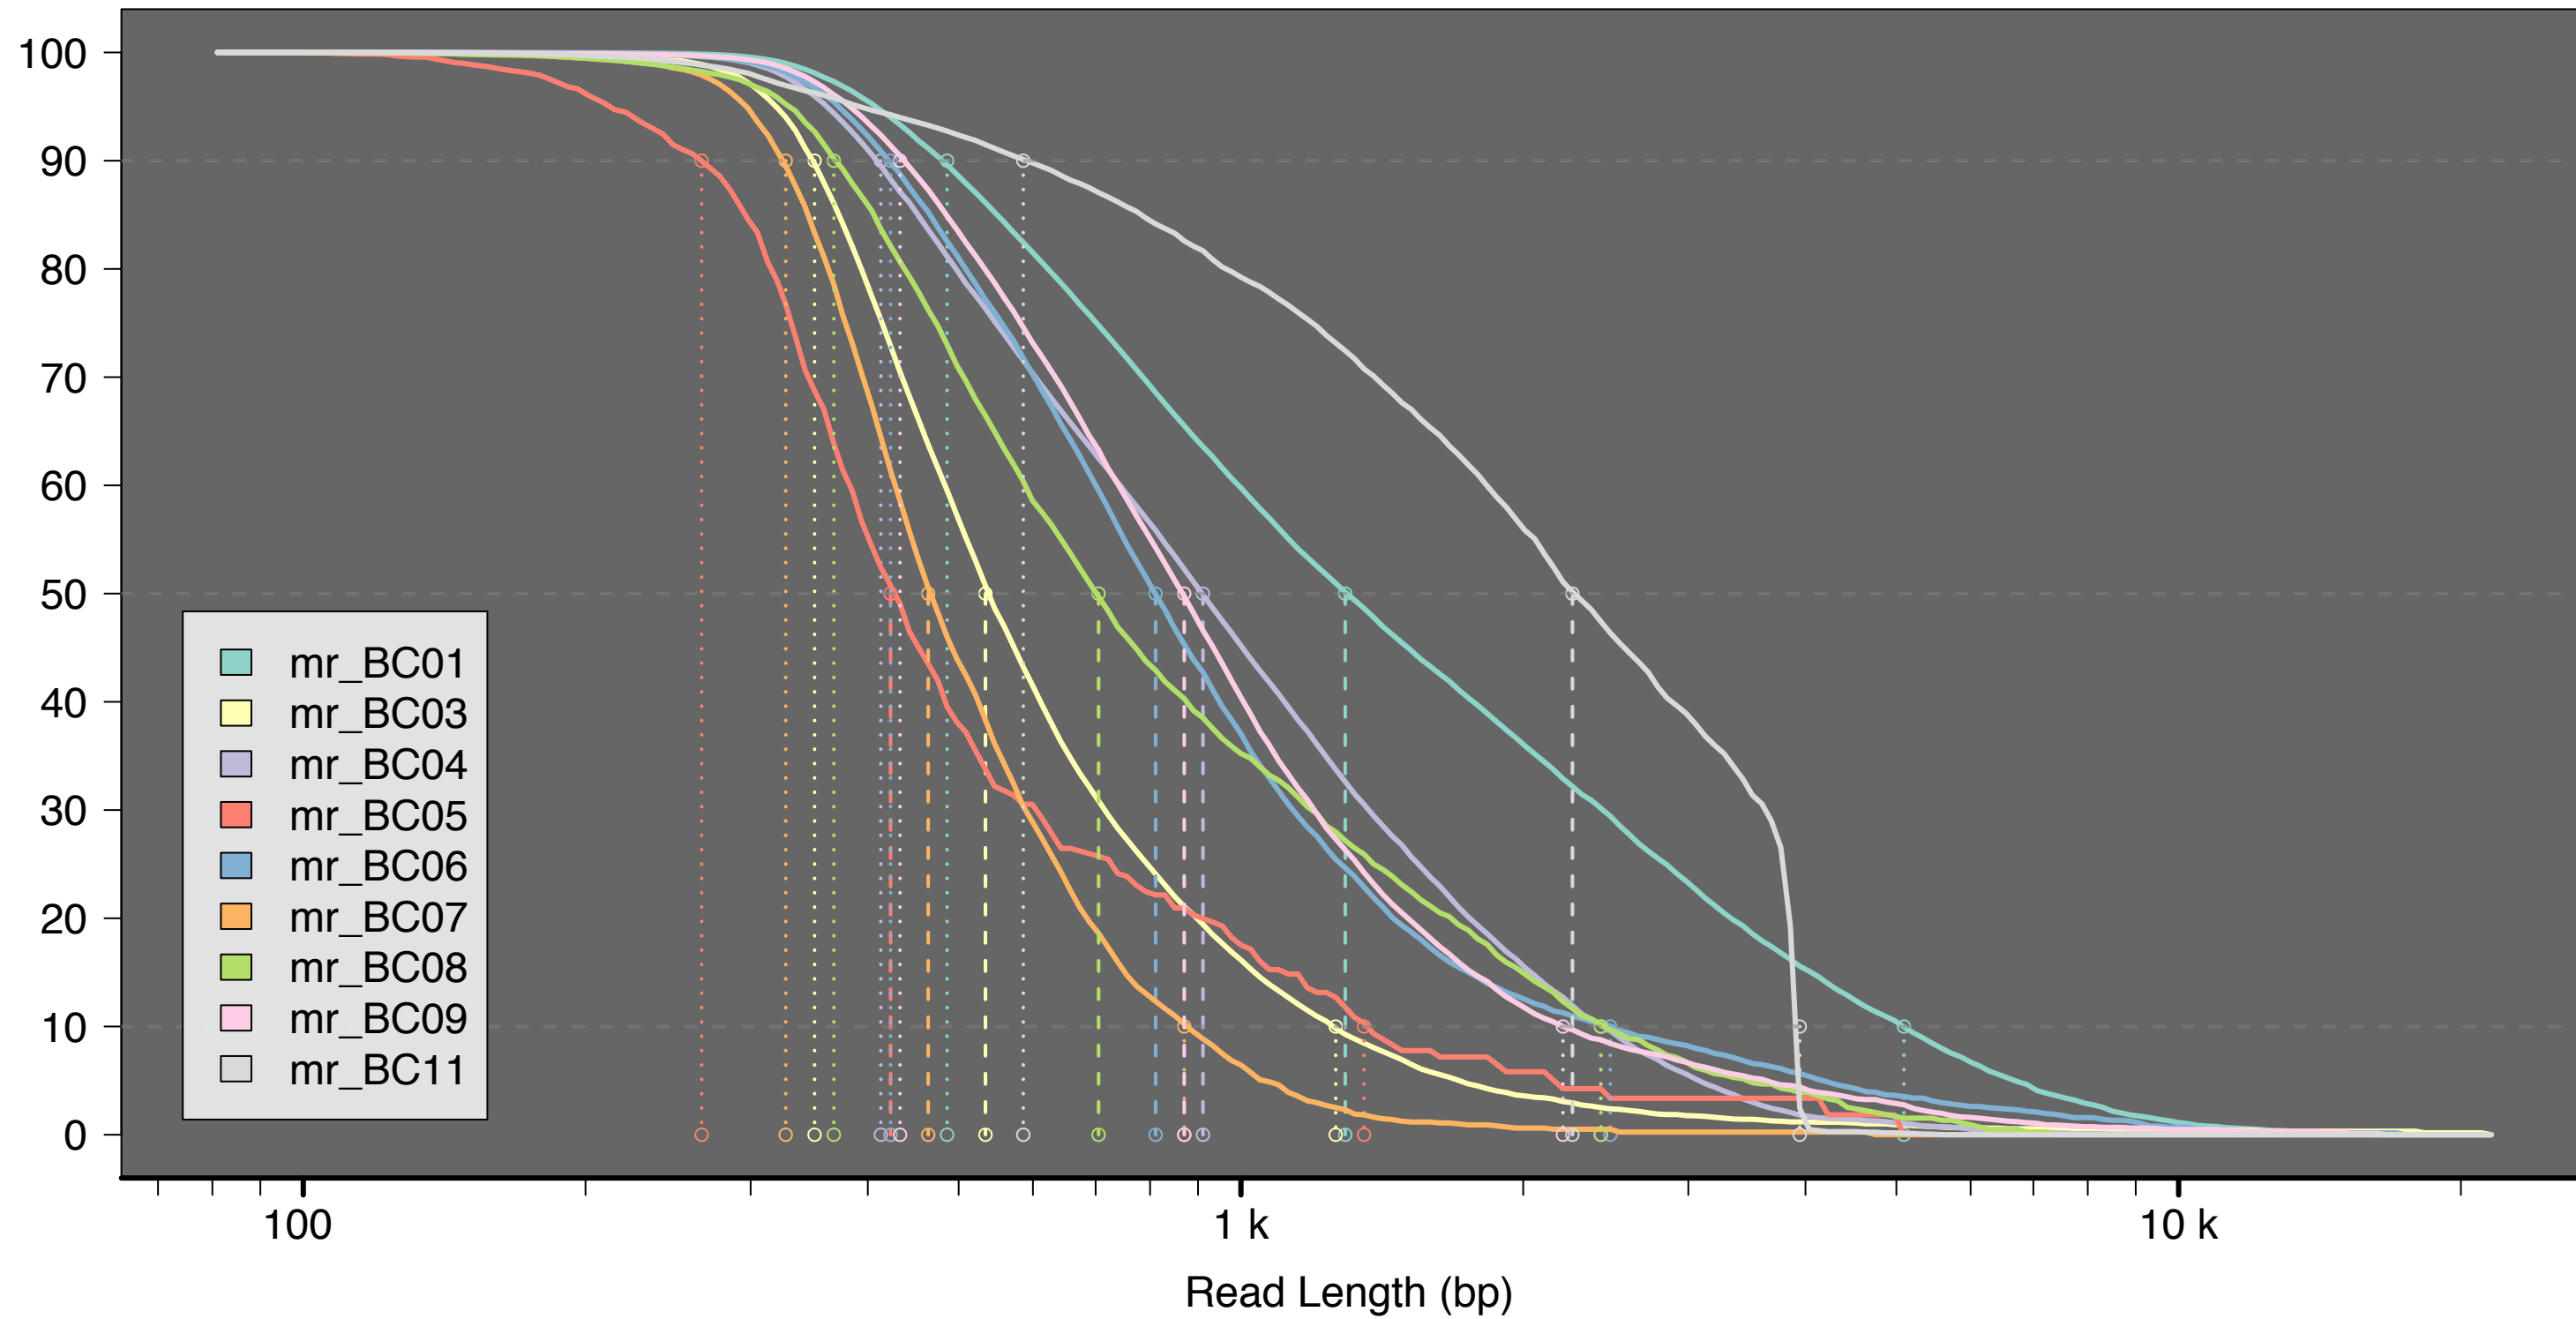

mr\_BC01

mr\_BC03

mr\_BC04

mr\_BC05

mr\_BC06

mr\_BC07

mr\_BC08

mr\_BC09

mr\_BC11

100

500

2 k

5 k

20 k

Read Length (bp)

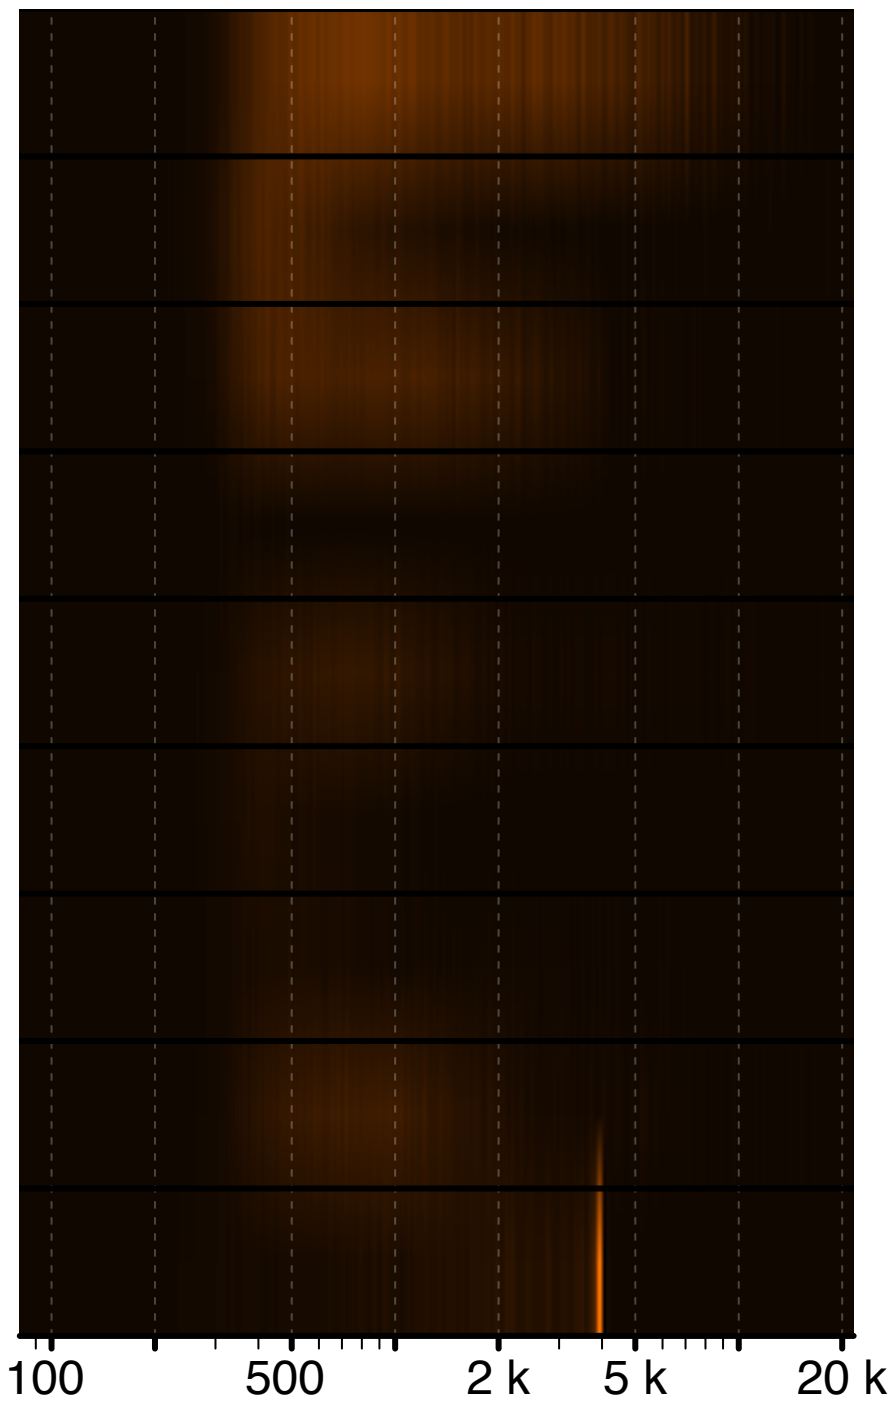

mr\_BC01

mr\_BC03

mr\_BC04

mr\_BC05

mr\_BC06

mr\_BC07

mr\_BC08

mr\_BC09

mr\_BC11

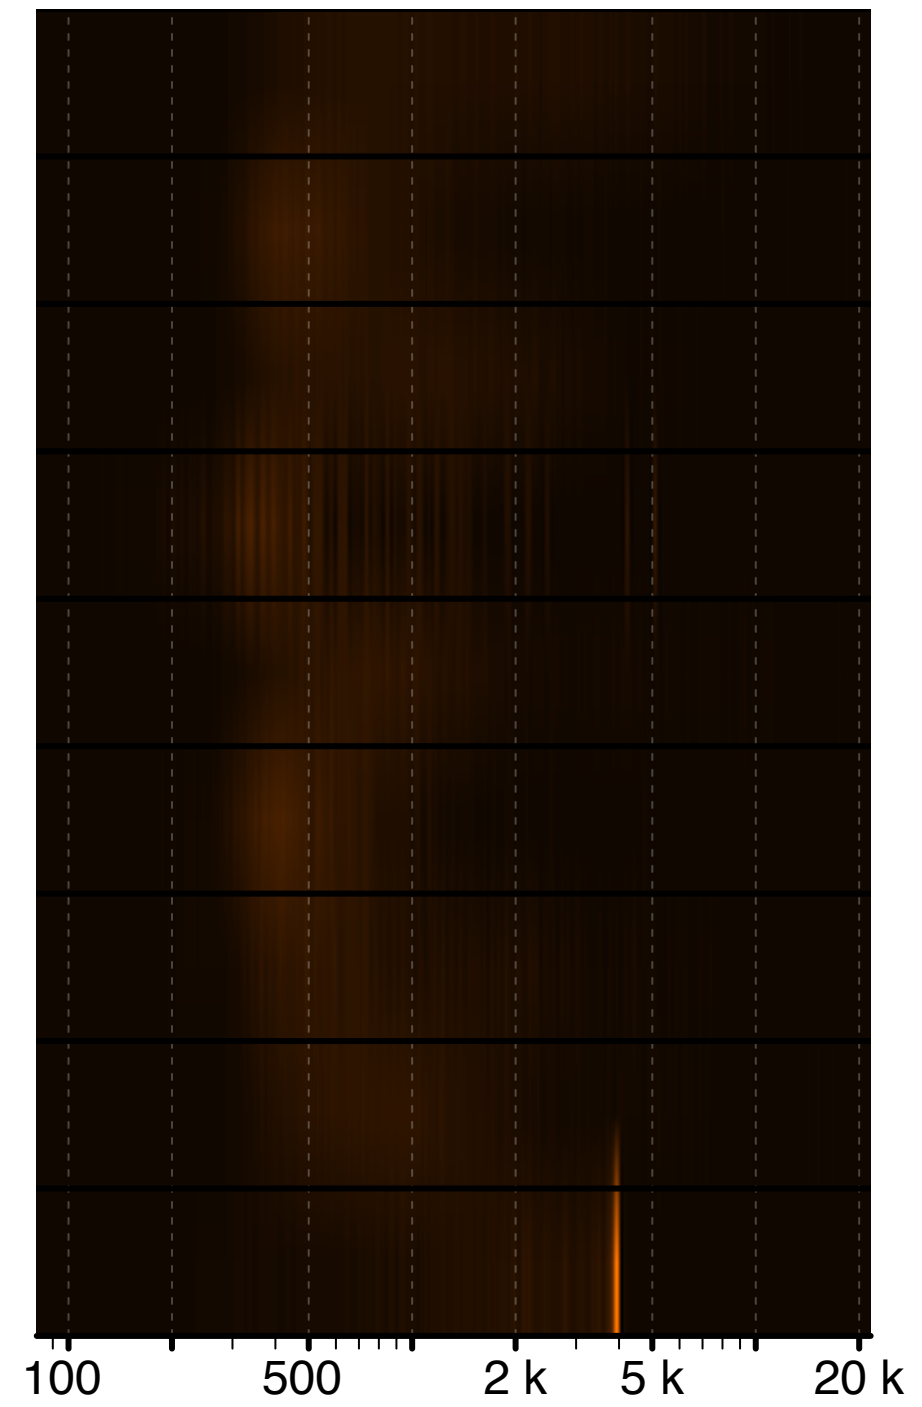

Read Length (bp)

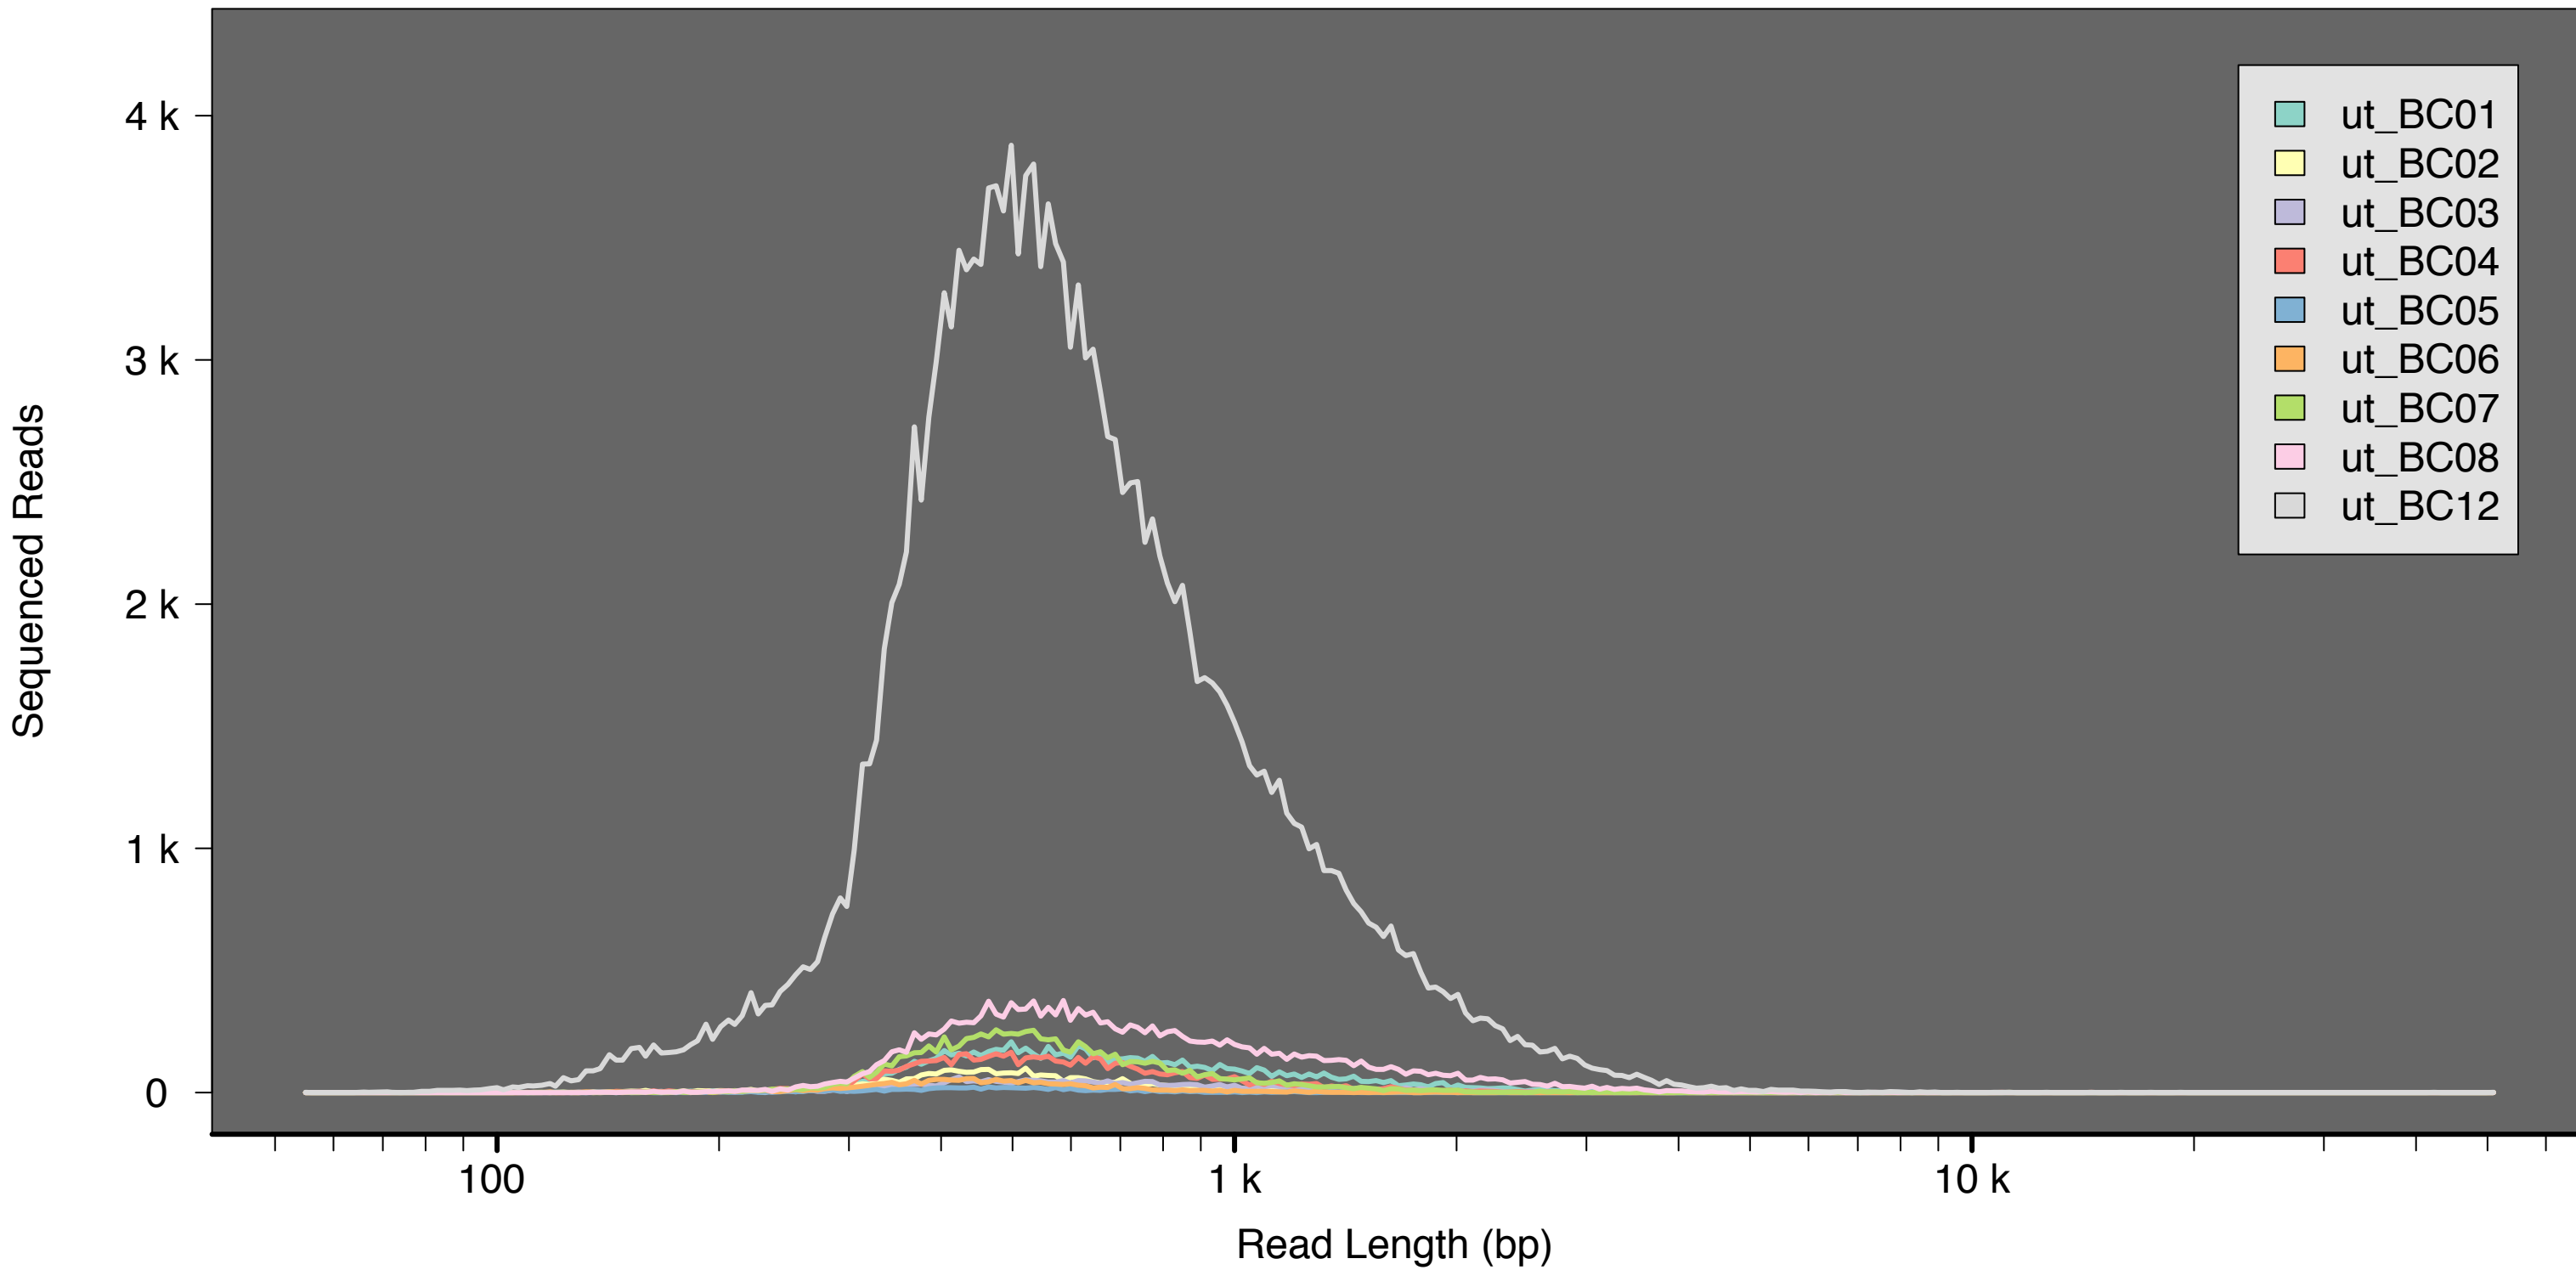

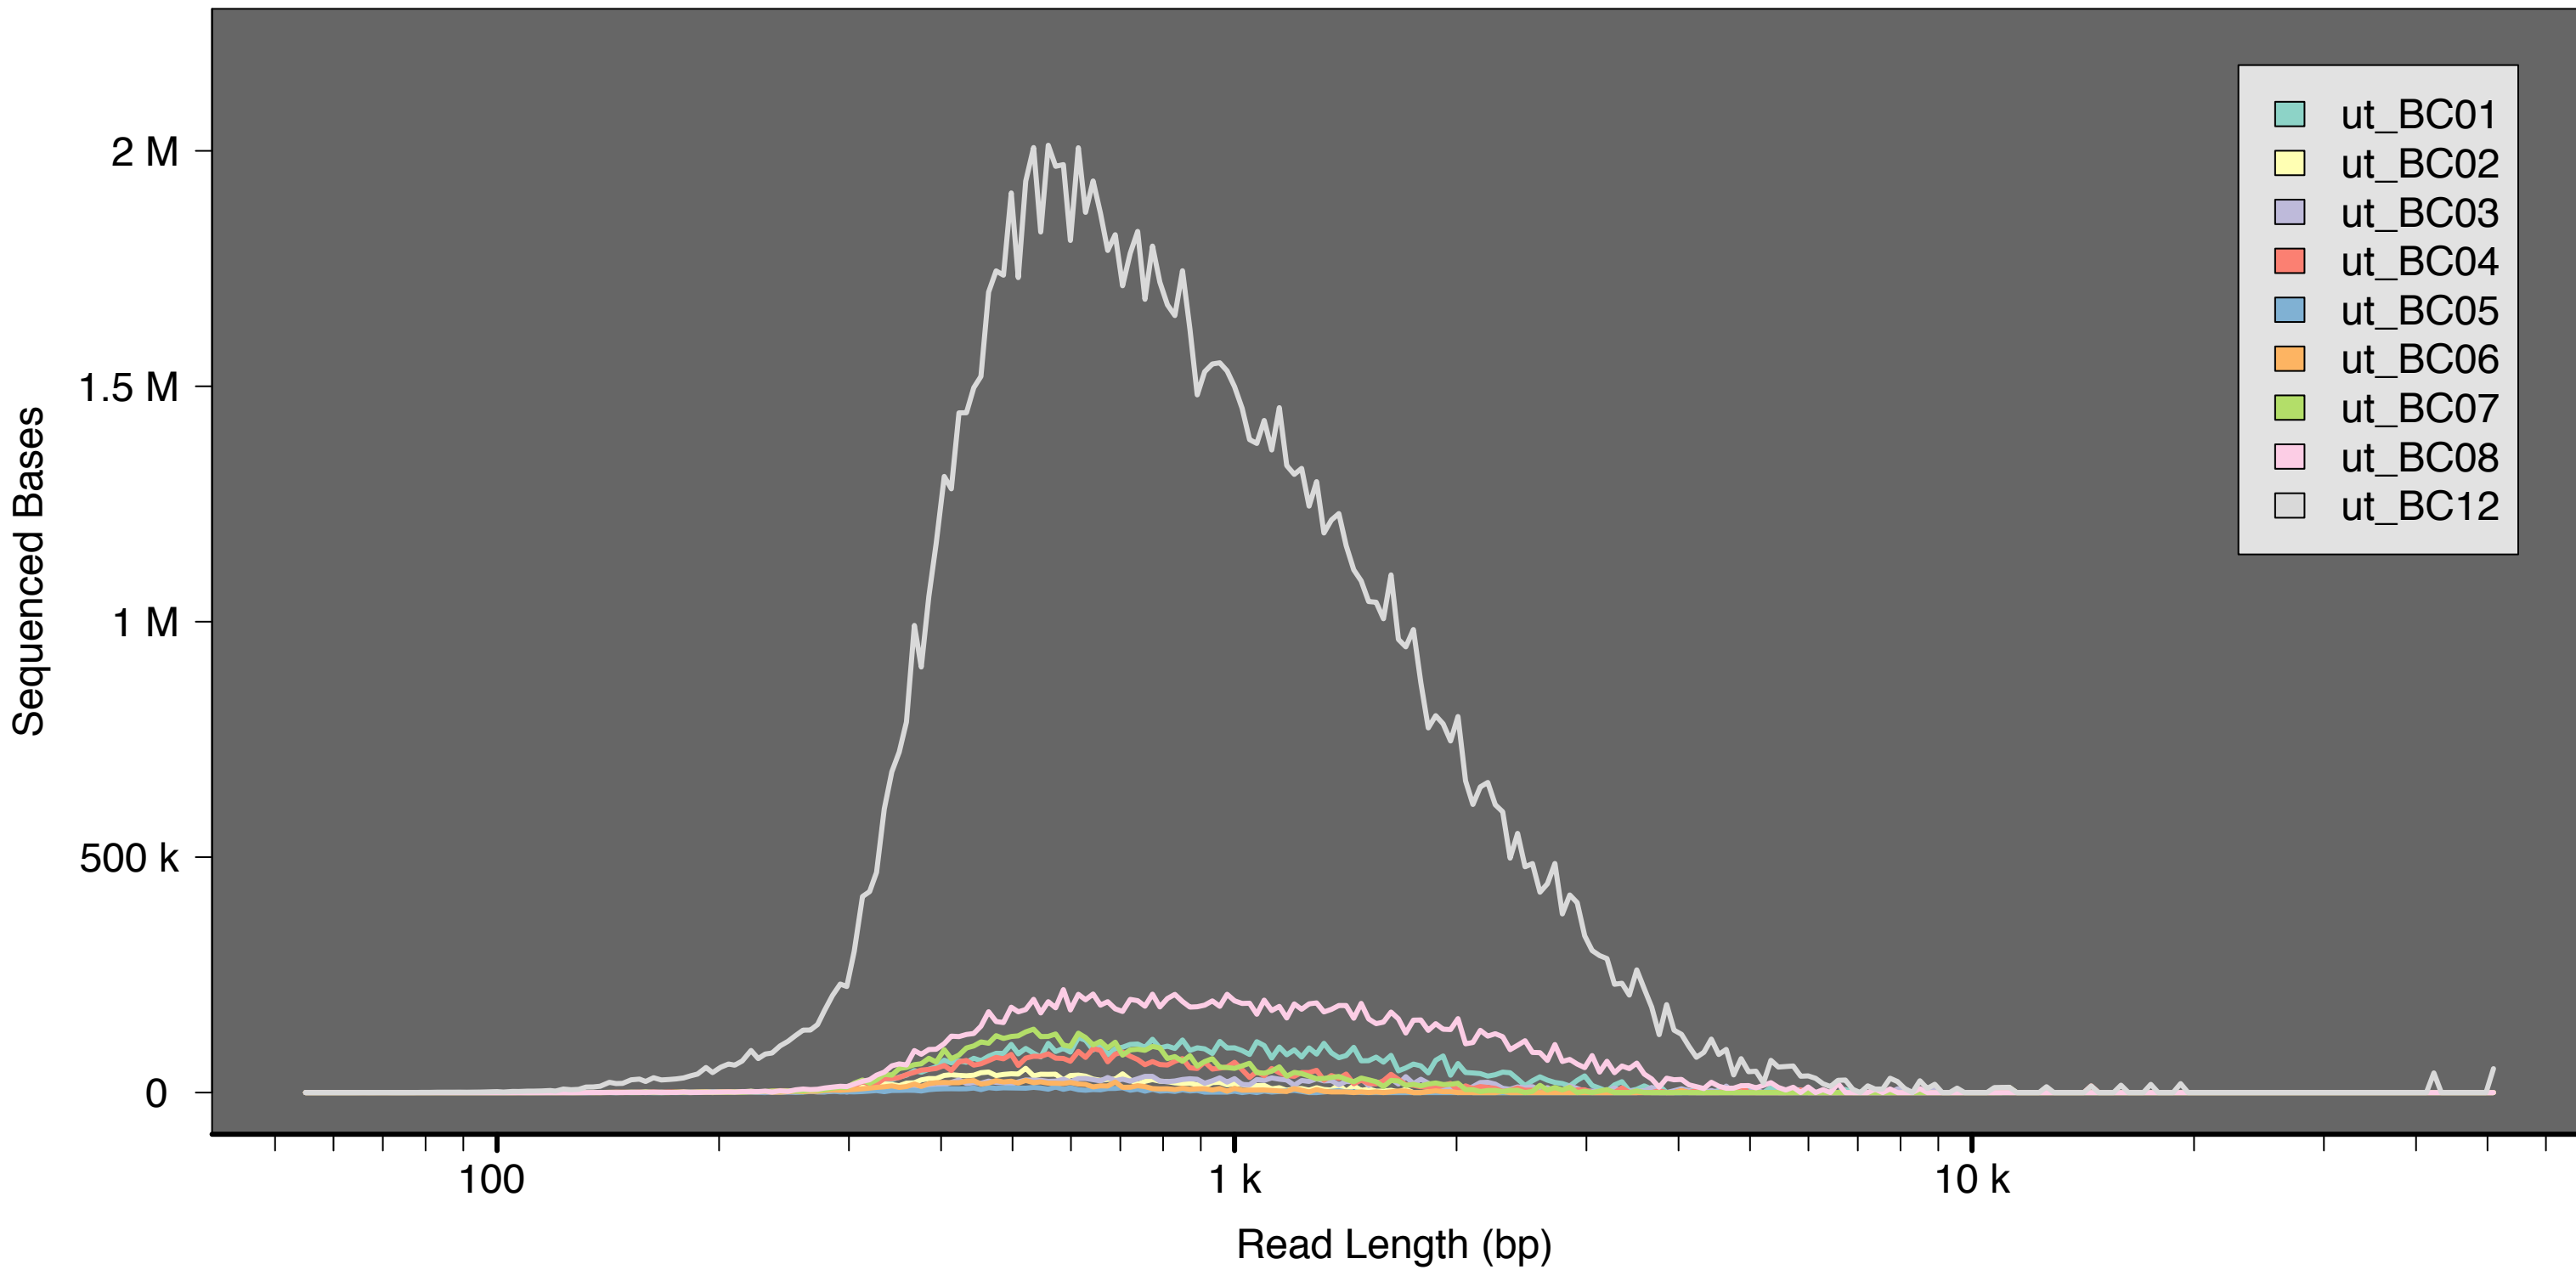

Sequenced Base Proportion

0.035  
0.030  
0.025  
0.020  
0.015  
0.010  
0.005  
0.000

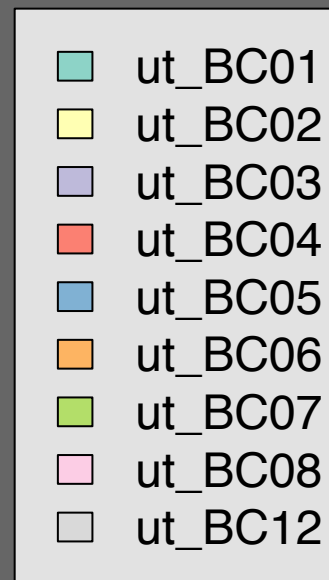

100

1 k

10 k

Read Length (bp)

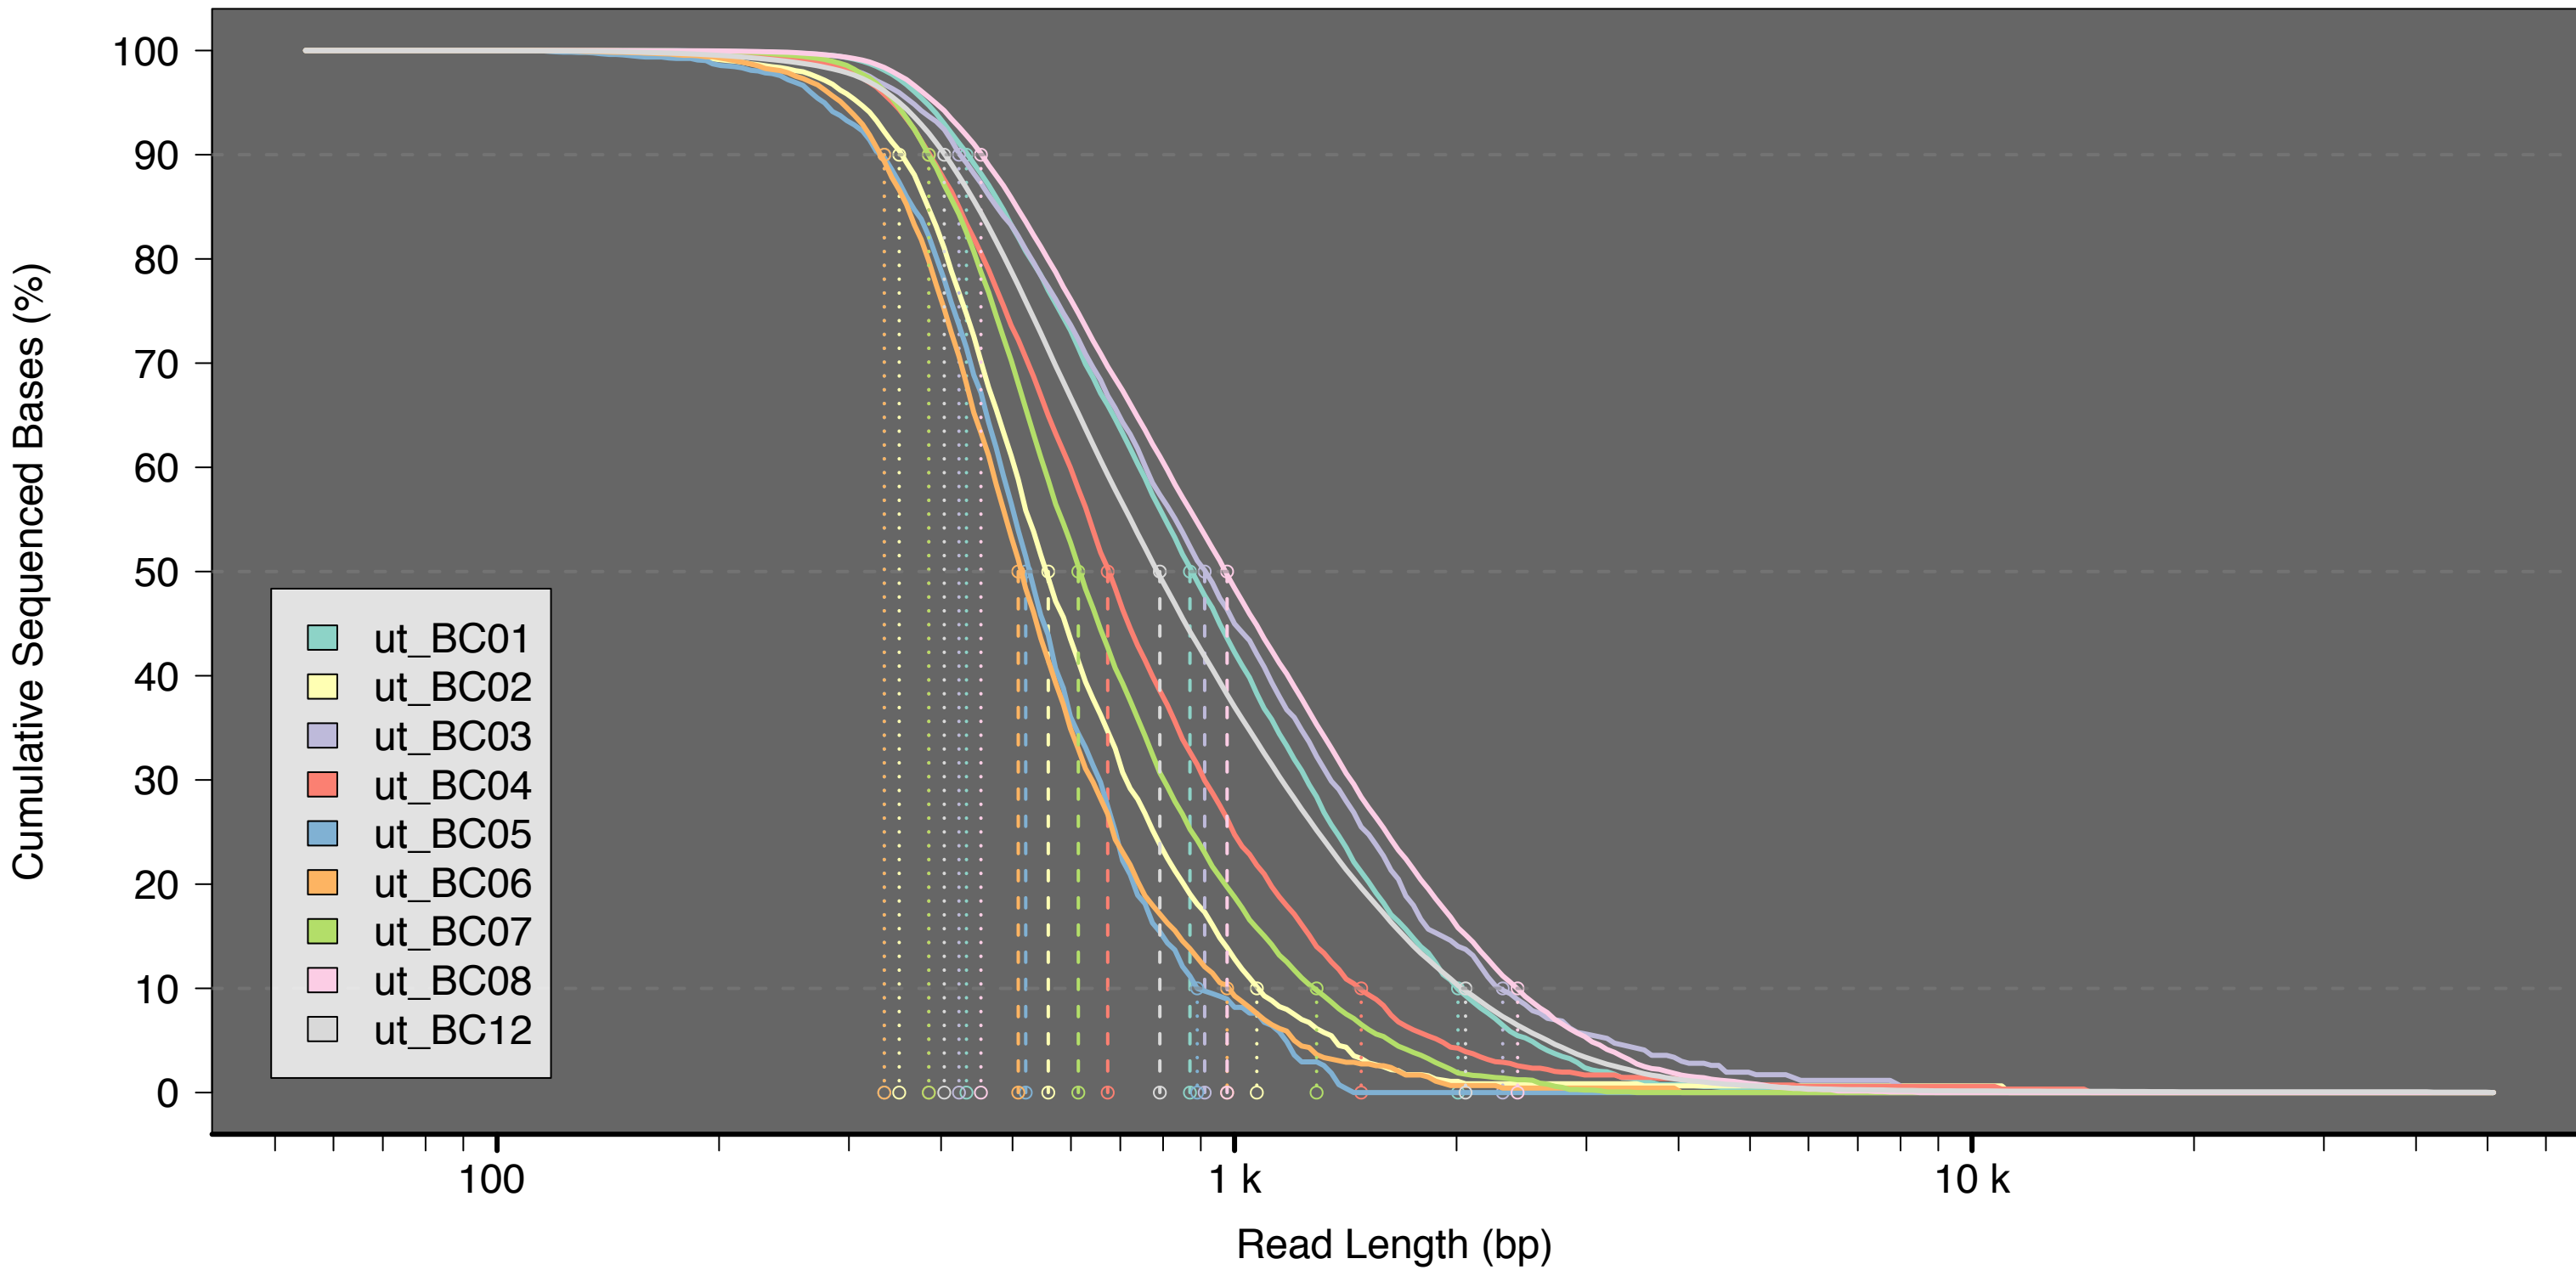

ut\_BC01

ut\_BC02

ut\_BC03

ut\_BC04

ut\_BC05

ut\_BC06

ut\_BC07

ut\_BC08

ut\_BC12

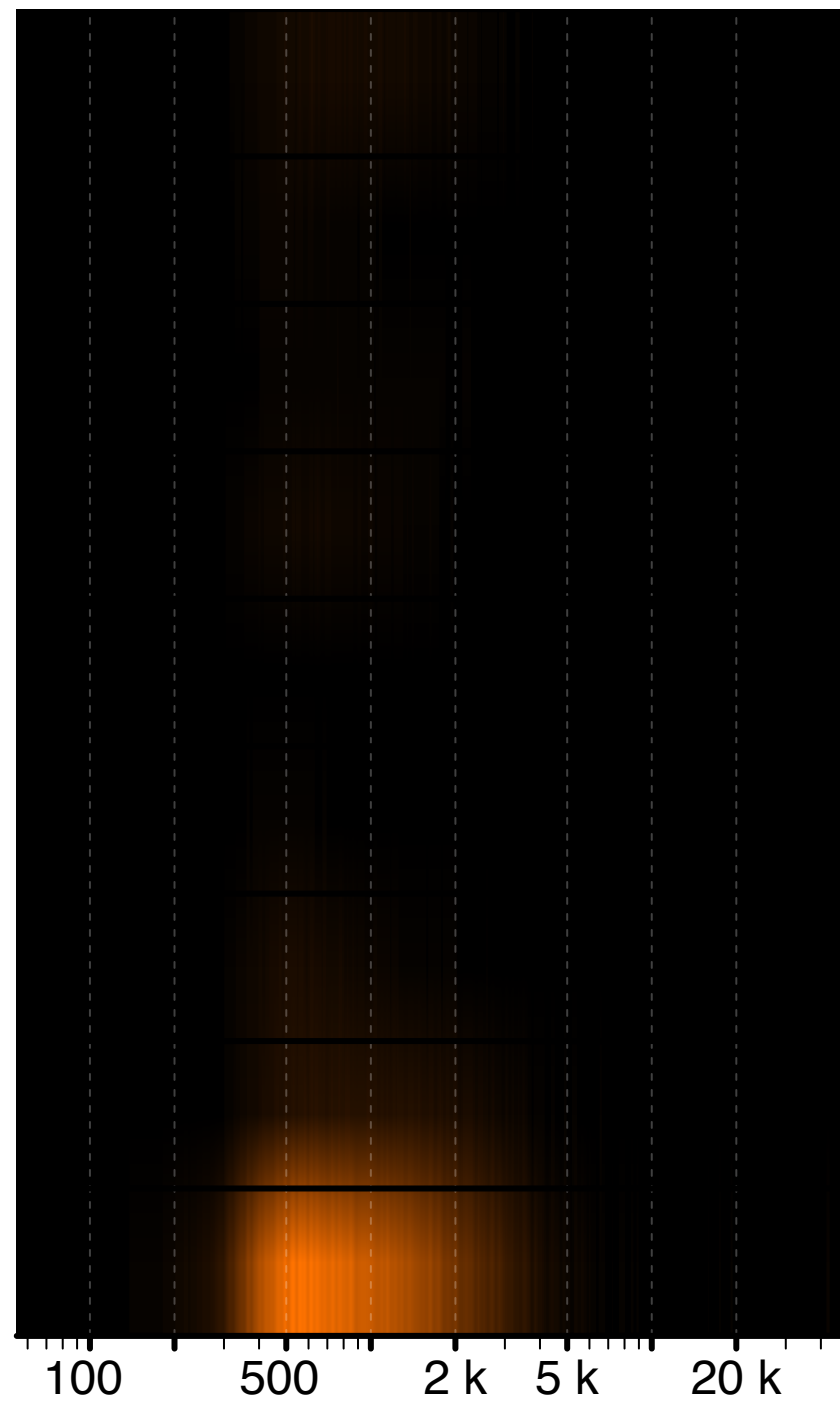

Read Length (bp)

ut\_BC01

ut\_BC02

ut\_BC03

ut\_BC04

ut\_BC05

ut\_BC06

ut\_BC07

ut\_BC08

ut\_BC12

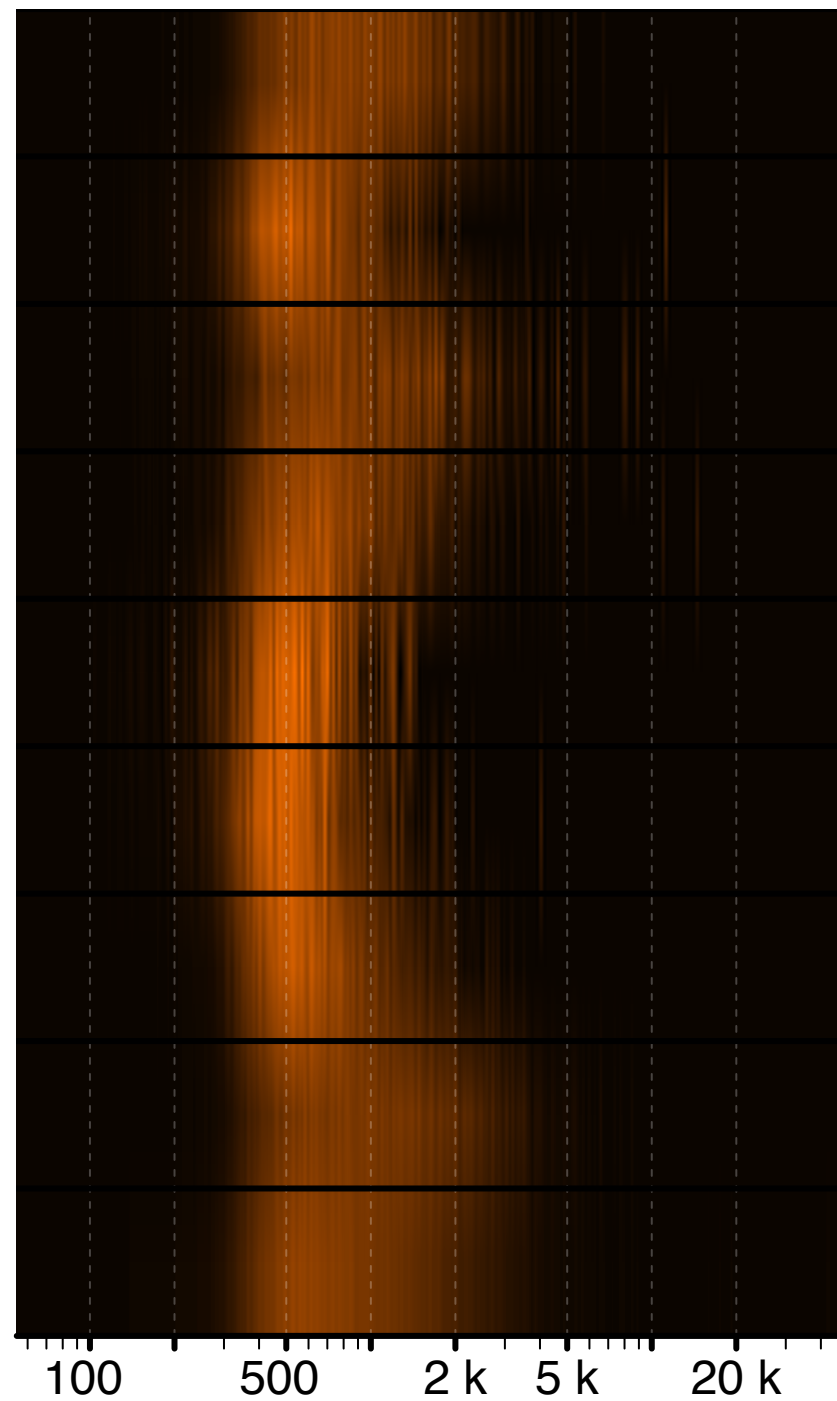

Read Length (bp)

Sequenced Reads

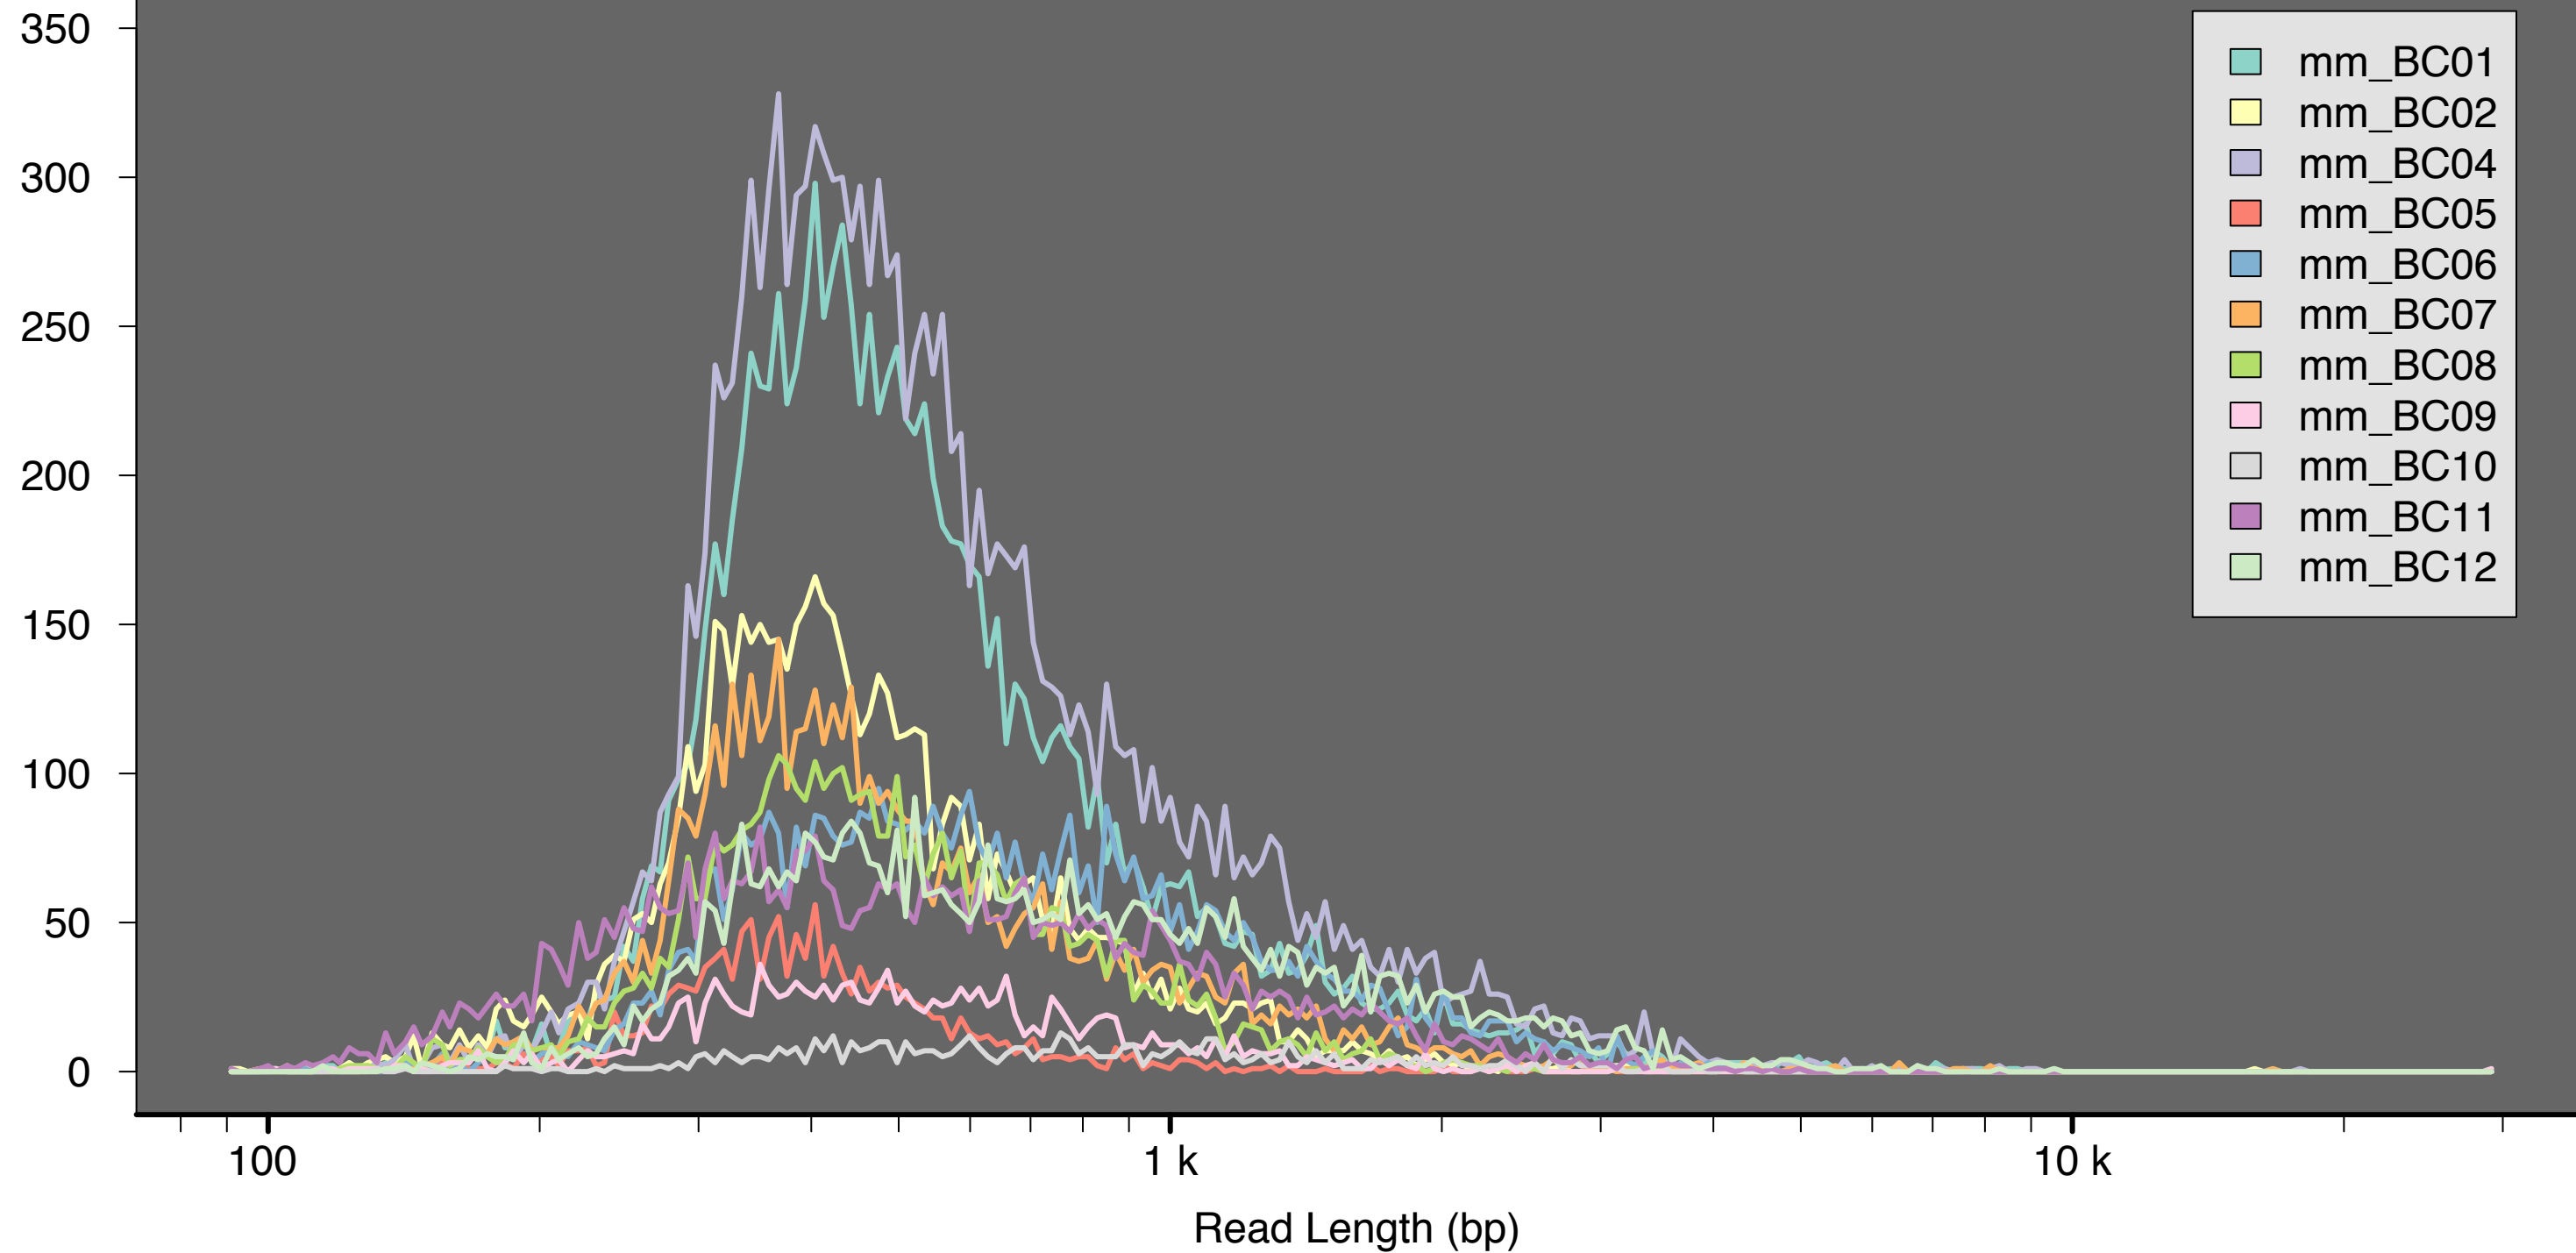

Sequenced Bases

150 k  
100 k  
50 k  
0

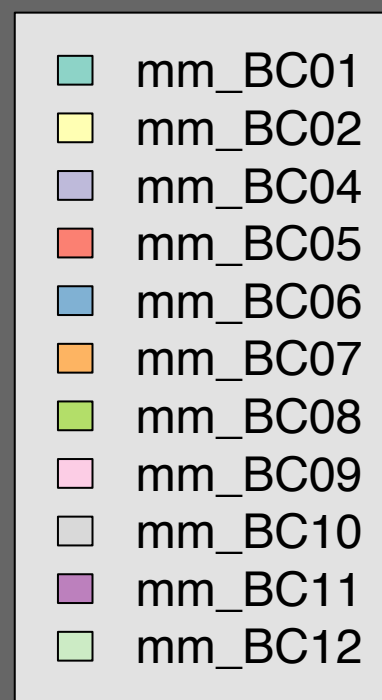

100

1 k

10 k

Read Length (bp)

Sequenced Base Proportion

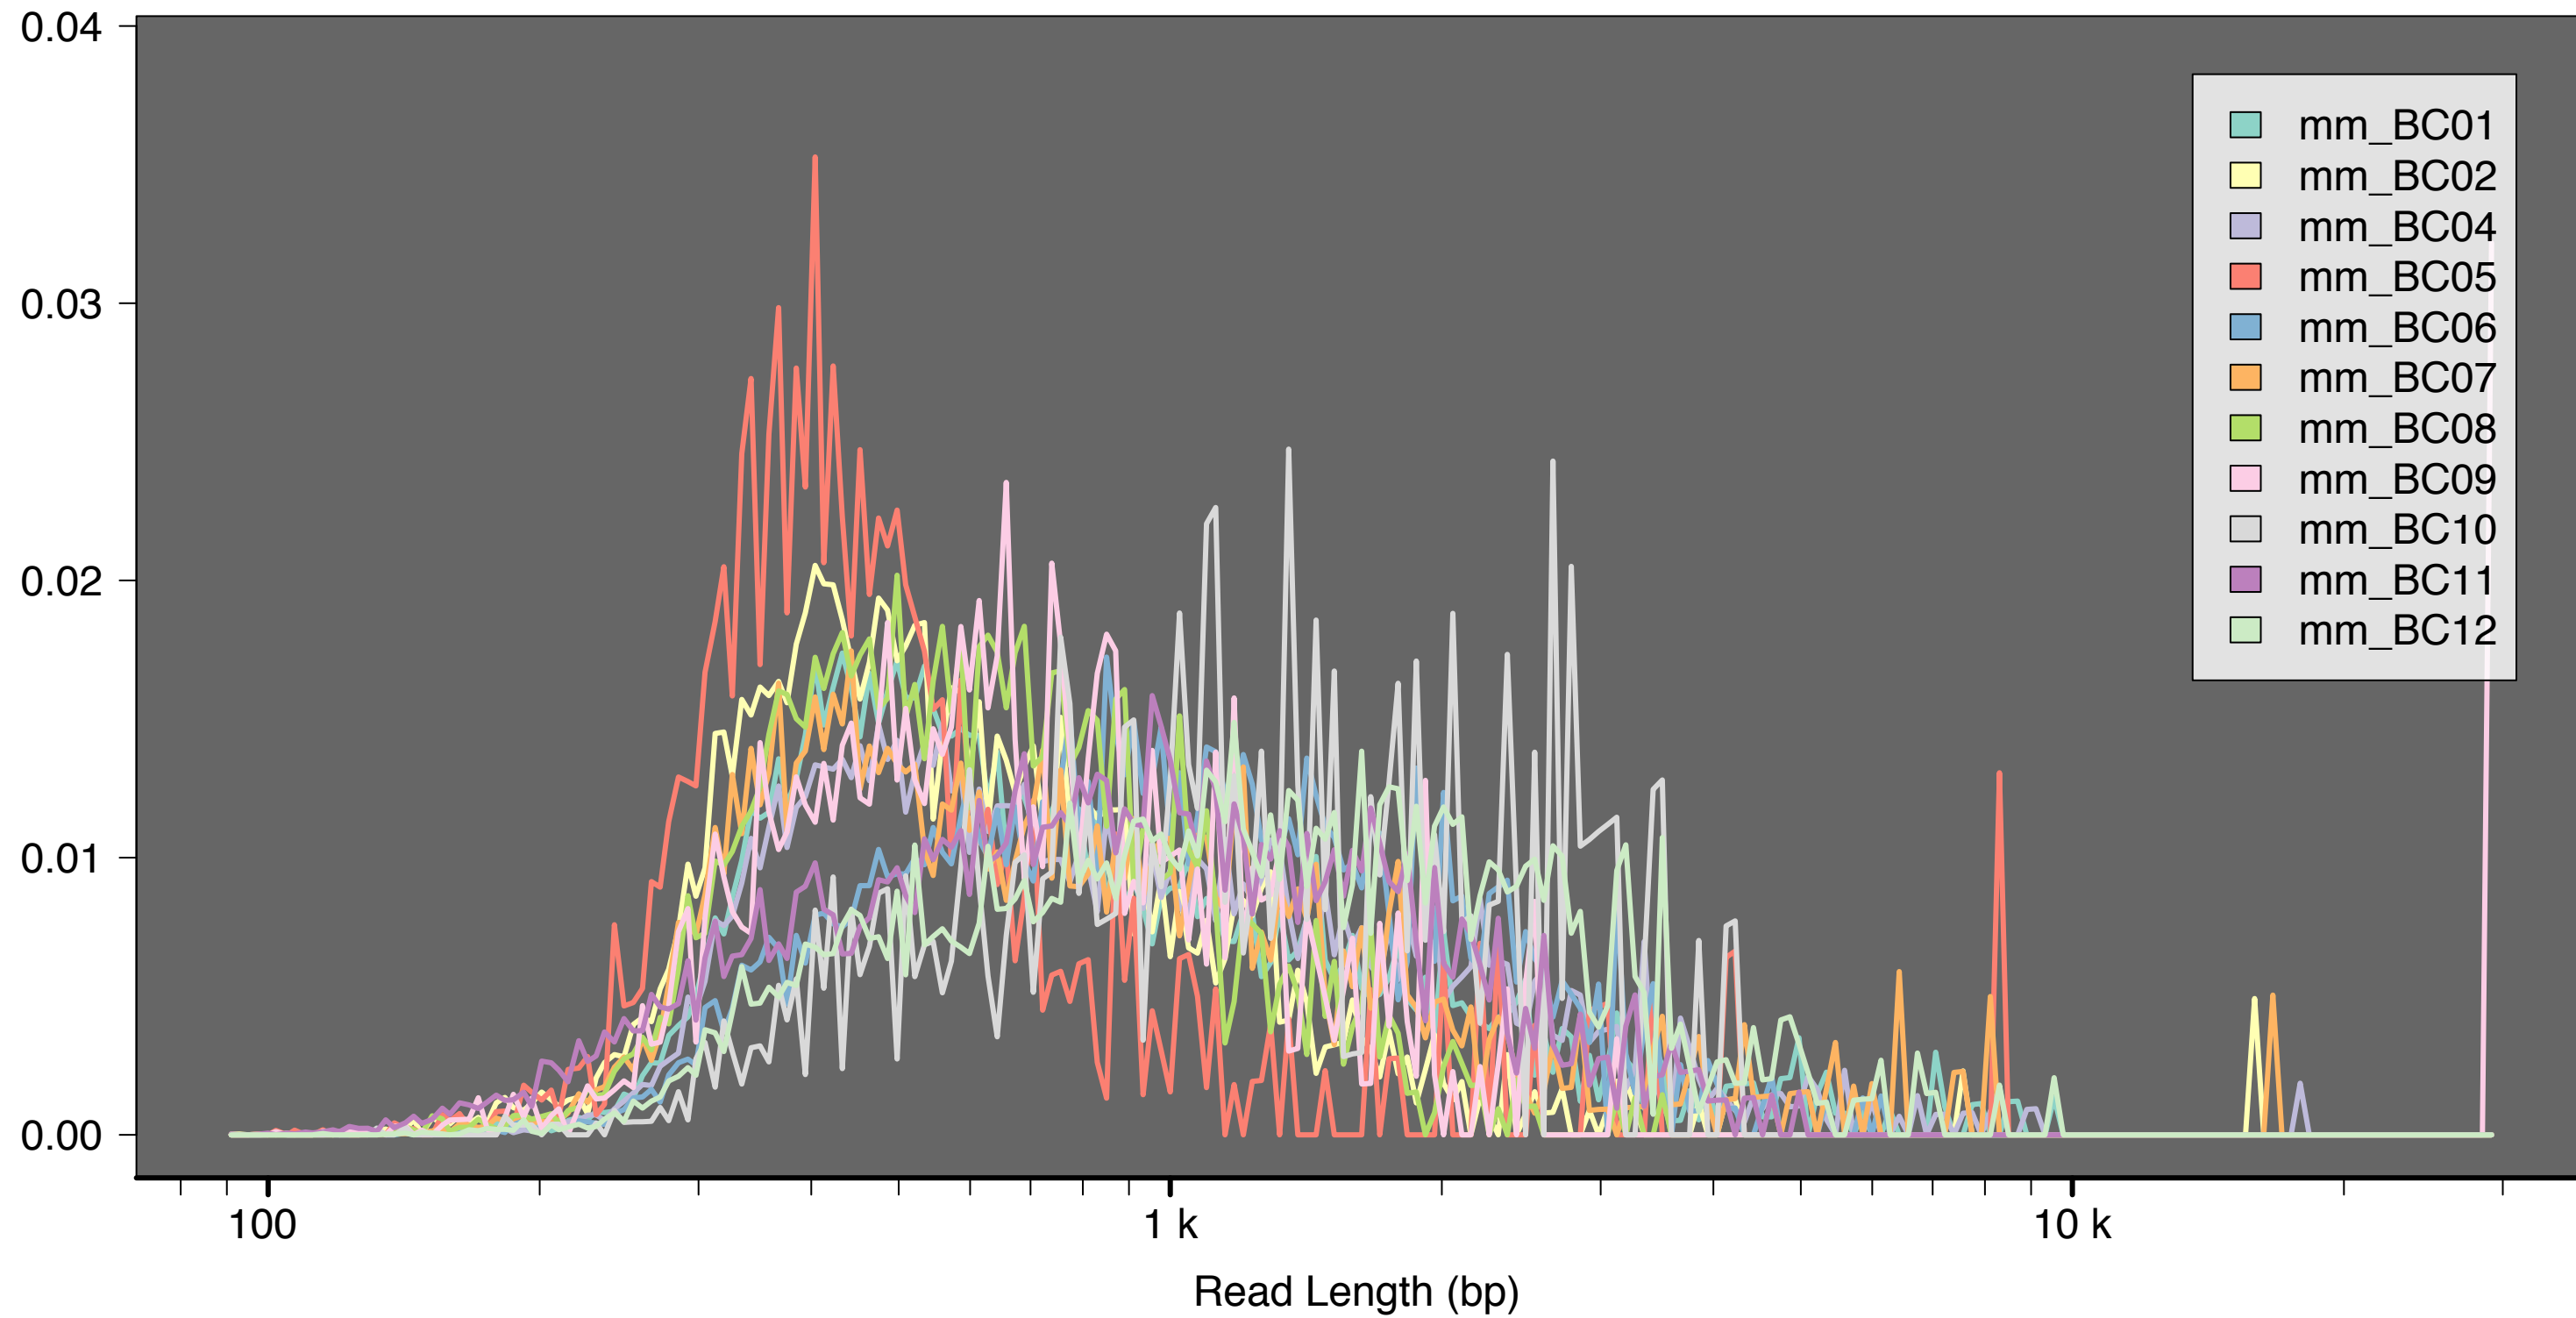

Cumulative Sequenced Bases (%)

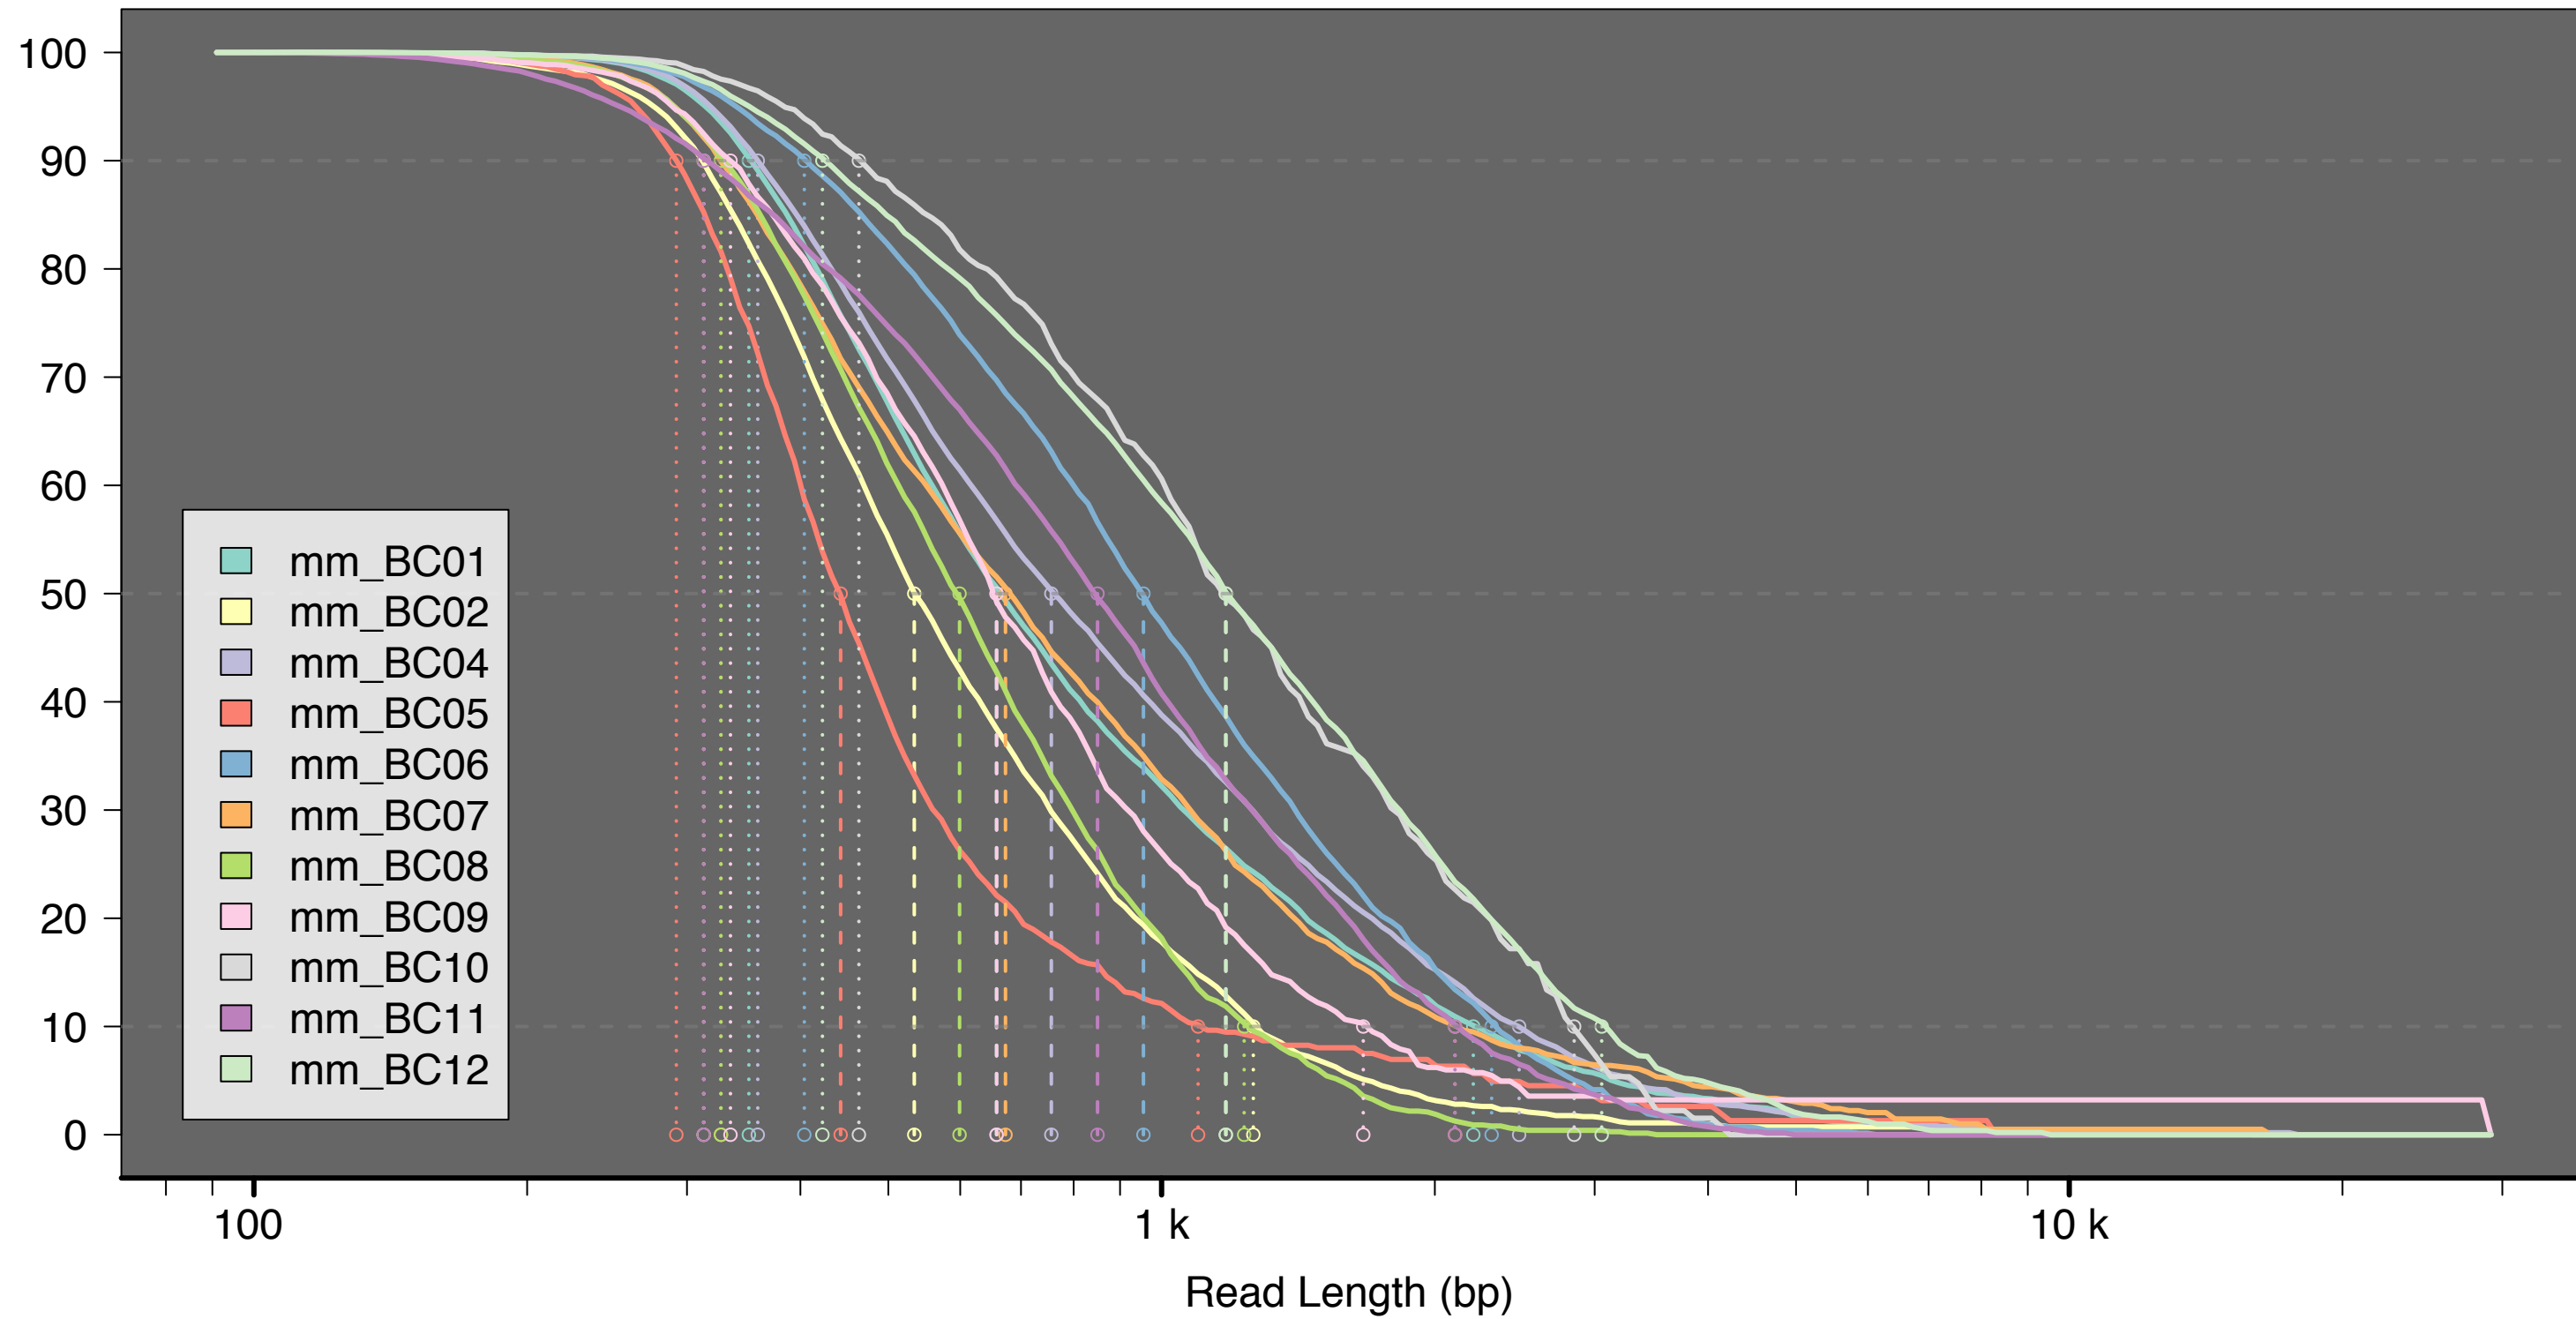

mm\_BC01  
mm\_BC02  
mm\_BC04  
mm\_BC05  
mm\_BC06  
mm\_BC07  
mm\_BC08  
mm\_BC09  
mm\_BC10  
mm\_BC11  
mm\_BC12

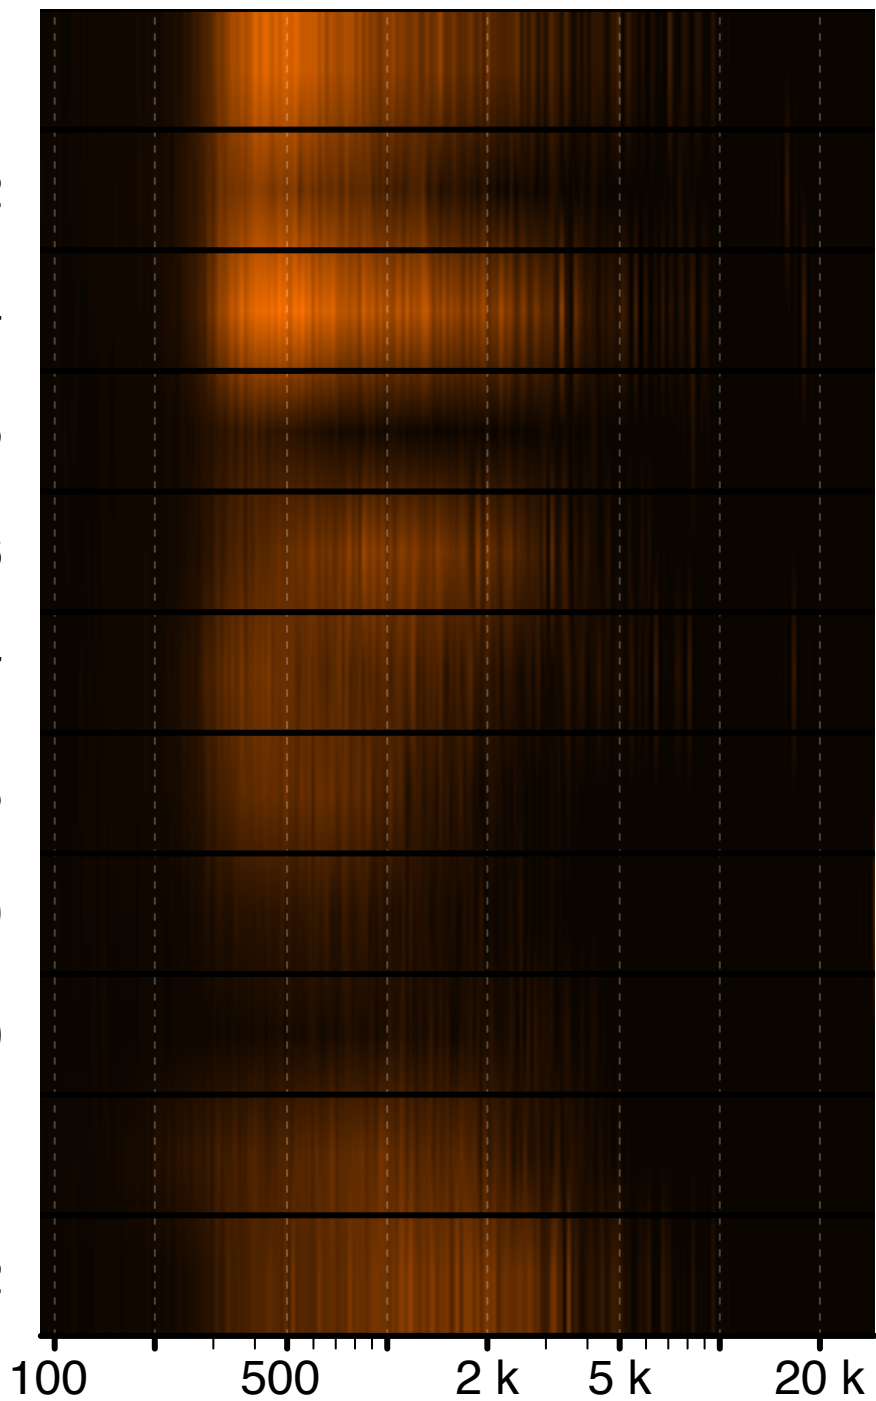

Read Length (bp)

mm\_BC01

mm\_BC02

mm\_BC04

mm\_BC05

mm\_BC06

mm\_BC07

mm\_BC08

mm\_BC09

mm\_BC10

mm\_BC11

mm\_BC12

100

500

2 k

5 k

20 k

Read Length (bp)

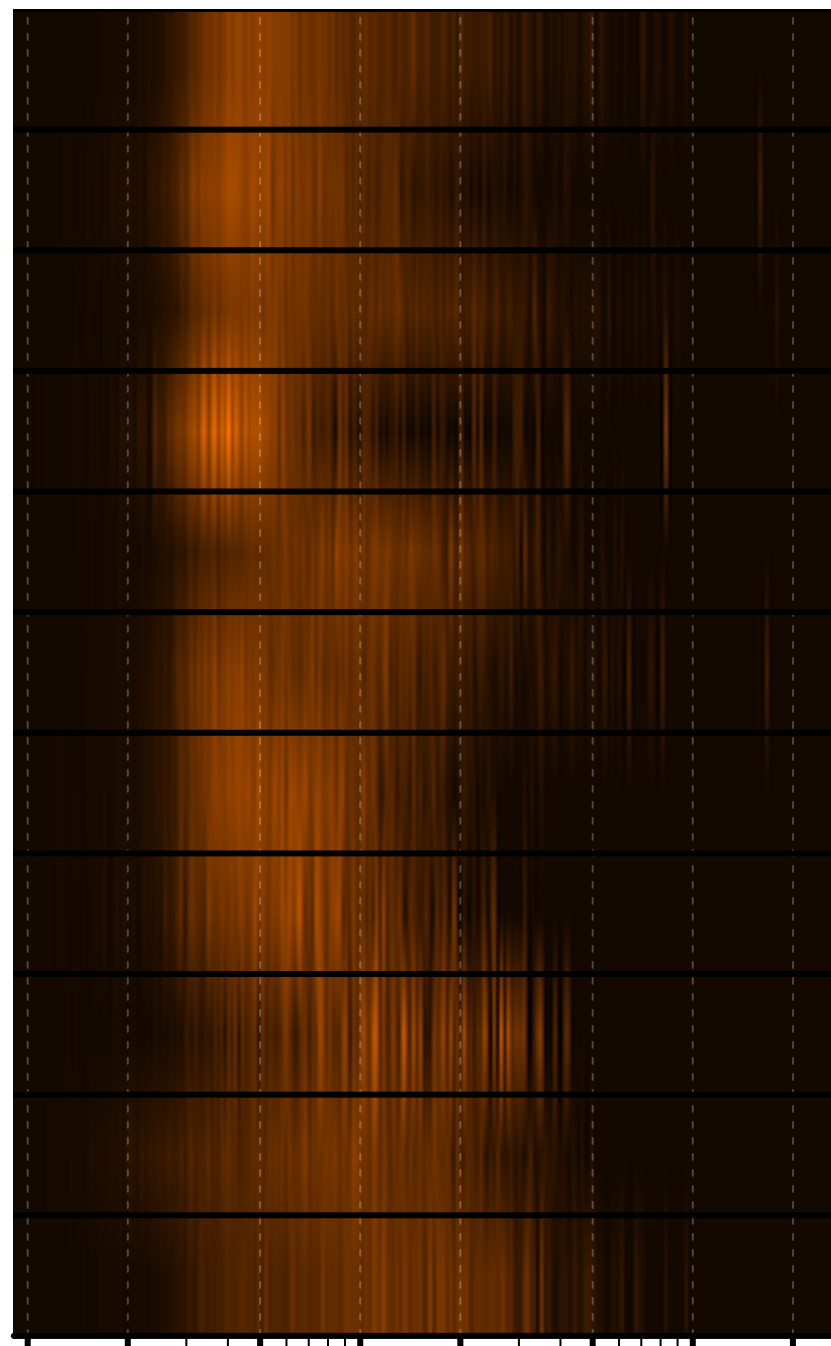

Supplement: Supplementary file 1 [file genes-10-00632-s001.zip › SupplementalFile1.pdf]
