# Supplementary material for: Tree Lab: Portable Genomics for Early Detection of Plant Viruses and Pests in Sub-Saharan Africa
Source: Genes (Basel). 2019 Aug 21;10(9):632. doi: 10.3390/genes10090632 (PMC6769854; doi:10.3390/genes10090632)
Supplement: Supplementary file 1 [file genes-10-00632-s001.zip]

Archive with 4 entries (4 files):
- SupplementalFile1.pdf
- SupplementalFile2_TRL_pavian_sample_set_report.html
- Table2SummaryStats.xlsx
- Table2SummaryStats_MK.XLSX
