# Supplementary material for: Tree Lab: Portable Genomics for Early Detection of Plant Viruses and Pests in Sub-Saharan Africa
Source: Genes (Basel). 2019 Aug 21;10(9):632. doi: 10.3390/genes10090632 (PMC6769854; doi:10.3390/genes10090632)
Supplement: Supplementary file 1 [file genes-10-00632-s001.zip › Table2SummaryStats_MK.XLSX]

## Sheet: original table
Tanzania	Kisamwene, Mara Region
Sample	DNA Extraction venue	Variety	Severity Score	Tissue type	Rapid Barcode	Total Sequence #	Max. Seq Length	Mean Seq Leng.	SD Mean Leng	CMV Blast hits	Max. CMV leng.	Min CMV leng.	% CMV of total	Canu Contigs
1	In field	Kilati - Local Variety	4	Leaf	1	61317	26107	948.5	1132.9	125	2808	196	0.203859	0
3	In field	Kilati - Local Variety	4	Leaf	3	21468	16098	442.2	507.1	14	815	288	0.0652133	0
4	In field	Kasuxsali - Local Variety	3	Leaf	4	31300	17624	694	699.7	21	941	129	0.0670927	12
5	In field	Mukombozi - Virus Resistant - Multiplication Plot	1	Leaf	5	2117	24665	501.8	1533.8	7	815	198	0.330657	0
6	In field	Mukombozi - Virus Resistant - Multiplication Plot	1	Leaf	6	27178	12340	664	676.5	8	826	85	0.0294356	0
7	In field	Mukombozi - Virus Resistant - Multiplication Plot	1	Leaf	7	5634	17003	423	773.9	5	484	243	0.0887469	0
8	In field	Whitefly close to Mukombozi - Virus Resistant - Multiplication Plot	1	1x Whitefly in approx 5µl EtOH	8	6237	8753	550	685.9	26	828	52	0.416867	0
9	In field	Whitefly close to Mukombozi - Virus Resistant - Multiplication Plot	1	1x Whitefly in approx 5µl EtOH	9	25289	17900	657.6	692	3	0	0	0	2
10	In field	Whitefly close to Mukombozi - Virus Resistant - Multiplication Plot	1	1x Whitefly in approx 5µl EtOH	10	798	23259	683	1218.8	21	815	187	2.63158	0
11	In field	ACMV - Positive Control extracted using CTAB in Dar Es Salaam			11	10966	28541	790	1146.1	4311	1598	31	39.3124	0
12	In field	EACMV - Positive Control extracted using CTAB in Dar Es Salaam			12	1797	22871	539	948.5	9	830	191	0.500835	0
None	In field	Porechop unable to match to Rapid Barcode			None	449981	276793	724.8	2459.9	8136	2757	28	1.80808
						644082	40996.2
Uganda	Wakiso
Sample	DNA Extraction venue	Variety	Severity Score	Tissue type	Rapid Barcode	Total Sequence #	Max. Seq Length	Mean Seq Leng.	SD Mean Leng	CMV Blast hits	Max. CMV leng.	Min CMV leng.	% CMV of total
1	In lab	R39-B1-UG15F289P503	4	Leaf from stem 1	1	24343	24373	683.3	571.3	20	1222	123	0.0821591	2
1.1	In lab	R39-B1-UG15F289P503	4	Phloem under bark from stem 1 - top	2	5135	50184	477.4	980	0	0	0	0	0
1.2	In lab	R39-B1-UG15F289P503	4	Phloem under bark from stem 1 - mid point	3	4010	9768	687.6	617.8	0	0	0	0	0
1.3	In lab	R39-B1-UG15F289P503	4	Phloem under bark from stem 1 - bottom	4	10314	48265	547.8	648.1	1	402	402	0.00969556	0
5	In field	Kwatempale from Sarah's Farm	4	Leaf	5	3012	66062	476	1640.2	11	604	107	0.365206	0
6	In field	Kwatempale from Sarah's Farm	5	Leaf	6	5074	5243	401.6	263.8	1	235	235	0.0197083	0
7	In field	Wild Plant from Naomi's Farm	3	Leaf	7	16386	45024	518.5	508.8	6	1121	352	0.0366166	0
9	In field	Sick branch from NAROCass1 from Naomi's Farm	3	Leaf	8	37822	20509	748.8	609	15	2021	166	0.0396595	12
WF5	In field	Kwatempale from Sarah's Farm: Whitefly from sample 5	4	1x Whitefly in no EtOH	9	347	41599	756.9	3004.5	0	0	0	0	0
WF7	In field	Wild Plant from Naomi's Farm: Whitefly from sample 7	3	1x Whitefly in no EtOH	10	2613	2613	517	491.9	0	0	0	0	0
WF8	In field	Baumarke from Naomi's Farm: Whitefly from sample 8	1	1x Whitefly in no EtOH	11	705	15596	362.1	933.7	0	0	0	0	0
None	In lab/In field	Porechop unable to match to Rapid Barcode			None	196290	267436	578.6	2456.7	59	1677	42	0.0300576
						306051	49722.7
Kenya	Kiambu
Sample	DNA Extraction venue	Variety	Severity Score	Tissue type	Rapid Barcode	Total Sequence #	Max. Seq Length	Mean Seq Leng.	SD Mean Leng	CMV Blast hits	Max. CMV leng.	Min CMV leng.	% CMV of total
1	In field	Local	1	Leaf	1	43049	39851	501	630.8	1	123	123	0.00232293	1
2	In field	Local	1	Leaf	2	15890	66540	441	1115.5	0	0	0	0	0
4	In field	Local	1	Leaf	4	38291	53843	558.1	661.9	3	890	251	0.00783474	1
5	In field	Local	1	Leaf	5	9213	44230	355.1	774.8	0	0	0	0	0
L1	In lab	Stem from CMV infected plant: JKUAT experimental plot	4	Leaf	6	28450	18287	669.7	597.4	219	2228	98	0.769772	3
L2	In lab	Stem from CMV infected plant: JKUAT experimental plot	4	Leaf	7	17320	42191	506.5	728.1	76	2127	78	0.438799	0
S1	In lab	Stem from CMV infected plant: JKUAT experimental plot	4	Phloem under bark - 22.5cm from tip	8	16310	24566	434.6	378.3	10	1485	269	0.0613121	0
S2	In lab	Stem from CMV infected plant: JKUAT experimental plot	4	Phloem under bark - 52.3cm from tip	9	5346	54245	522.1	1491.5	0	0	0	0	0
R1	In lab	Stem from CMV infected plant: JKUAT experimental plot	4	Root 1: collected from just under outer bark	10	7336	15689	774.1	791.4	0	0	0	0	0
R2	In lab	Stem from CMV infected plant: JKUAT experimental plot	4	Root 2: collected from just under outer bark	11	21576	24853	560	626.5	0	0	0	0	0
H1	In lab	Leaf from Healthy Plant: JKUAT experimental plot	1	Leaf	12	44295	33307	774.5	795.3	0	0	0	0	3
None	None	Porechop unable to match to Rapid Barcode			None	245390	265898	601.1	3146.5	75	2404	28	0.0305636
						492466	56958.3

## Sheet: Reformatted
Sample	Barcode	Variety	Severity Score	Tissue type	Total reads	Max. Seq Length	CMV Blast hits	Max. CMV length	Min CMV length	% CMV reads	Canu Contigs
Tanzania
1	1	Kilati - Local Variety	4	Leaf	61317	26107	125	2808	196	0.203859	0
3	3	Kilati - Local Variety	4	Leaf	21468	16098	14	815	288	0.0652133	0
4	4	Kasuxsali - Local Variety	3	Leaf	31300	17624	21	941	129	0.0670927	12
5	5	Mukombozi - Virus Resistant	1	Leaf	2117	24665	7	815	198	0.330657	0
6	6	Mukombozi - Virus Resistant	1	Leaf	27178	12340	8	826	85	0.0294356	0
7	7	Mukombozi - Virus Resistant	1	Leaf	5634	17003	5	484	243	0.0887469	0
8	8	Whitefly close to Mukombozi - Virus Resistant	1	1x Whitefly, in EtOH	6237	8753	26	828	52	0.416867	0
9	9	Whitefly close to Mukombozi - Virus Resistant	1	1x Whitefly, in EtOH	25289	17900	3	0	0	0	2
10	10	Whitefly close to Mukombozi - Virus Resistant	1	1x Whitefly, in EtOH	798	23259	21	815	187	2.63158	0
11*	11	ACMV - Positive Control DNA			10966	28541	4311	1598	31	39.3124	0
12*	12	EACMV - Positive Control DNA			1797	22871	9	830	191	0.500835	0
None	None	Porechop unable to match to Rapid Barcode			449981	276793	8136	2757	28	1.80808
Uganda
1*	1	R39-B1-UG15F289P503	4	Leaf from stem 1	24343	24373	20	1222	123	0.0821591	2
1.1*	2	R39-B1-UG15F289P503	4	Phloem, stem 1 - top	5135	50184	0	0	0	0	0
1.2*	3	R39-B1-UG15F289P503	4	Phloem, stem 1 - mid	4010	9768	0	0	0	0	0
1.3*	4	R39-B1-UG15F289P503	4	Phloem, stem 1 - bottom	10314	48265	1	402	402	0.00969556	0
5	5	Kwatempale from Sarah's Farm	4	Leaf	3012	66062	11	604	107	0.365206	0
6	6	Kwatempale from Sarah's Farm	5	Leaf	5074	5243	1	235	235	0.0197083	0
7	7	Wild Plant from Naomi's Farm	3	Leaf	16386	45024	6	1121	352	0.0366166	0
9	8	Sick branch from NAROCass1 from Naomi's Farm	3	Leaf	37822	20509	15	2021	166	0.0396595	12
WF5	9	Whitefly from sample 5	4	1x Whitefly, no EtOH	347	41599	0	0	0	0	0
WF7	10	Whitefly from sample 7	3	1x Whitefly, no EtOH	2613	2613	0	0	0	0	0
WF8	11	Whitefly from sample 8	1	1x Whitefly, no EtOH	705	15596	0	0	0	0	0
None*	None	Porechop unable to match to Rapid Barcode			196290	267436	59	1677	42	0.0300576
Kenya
1	1	Local	1	Leaf	43049	39851	1	123	123	0.00232293	1
2	2	Local	1	Leaf	15890	66540	0	0	0	0	0
4	4	Local	1	Leaf	38291	53843	3	890	251	0.00783474	1
5	5	Local	1	Leaf	9213	44230	0	0	0	0	0
L1*	6	Stem from CMV infected plant	4	Leaf	28450	18287	219	2228	98	0.769772	3
L2*	7	Stem from CMV infected plant	4	Leaf	17320	42191	76	2127	78	0.438799	0
S1*	8	Stem from CMV infected plant	4	Phloem, 22.5cm from tip	16310	24566	10	1485	269	0.0613121	0
S2*	9	Stem from CMV infected plant	4	Phloem, 52.3cm from tip	5346	54245	0	0	0	0	0
R1*	10	Stem from CMV infected plant	4	Root 1, under outer bark	7336	15689	0	0	0	0	0
R2*	11	Stem from CMV infected plant	4	Root 2, under outer bark	21576	24853	0	0	0	0	0
H1*	12	Leaf from Healthy Plant	1	Leaf	44295	33307	0	0	0	0	3
None	None	Porechop unable to match to Rapid Barcode			245390	265898	75	2404	28	0.0305636
			TOTALS		492466	56958.3
